# Supplementary material for: Macrophages of diverse phenotypes drive vascularization of engineered tissues
Source: PubMed Central journal article supplement — Sci Adv. 2020 May 1;6(18):eaay6391. doi: 10.1126/sciadv.aay6391 (PMC7195167; doi:10.1126/sciadv.aay6391), 2020-05-01
Supplement: aay6391_SM.pdf [file aay6391_SM.pdf]

## Supplementary Materials for

### **Macrophages of diverse phenotypes drive vascularization of engineered tissues**

P. L. Graney, S. Ben-Shaul, S. Landau, A. Bajpai, B. Singh, J. Eager, A. Cohen, S. Levenberg\*, K. L. Spiller\*

\*Corresponding author. Email: [shulamit@bm.technion.ac.il](mailto:shulamit@bm.technion.ac.il) (S.L.); [spiller@drexel.edu](mailto:spiller@drexel.edu) (K.L.S.)

Published 1 May 2020, *Sci. Adv.* **6**, eaay6391 (2020)  
DOI: 10.1126/sciadv.aay6391

#### **The PDF file includes:**

Tables S1 to S3  
Figs. S1 to S8  
Legends for movies S1 to S6

#### **Other Supplementary Material for this manuscript includes the following:**

(available at [advances.sciencemag.org/cgi/content/full/6/18/eaay6391/DC1](https://advances.sciencemag.org/cgi/content/full/6/18/eaay6391/DC1))

Movies S1 to S6

**Table S1. Panel of markers used to assess phenotype-induced changes in EC behavior.** Genes were selected based on a literature search of various stages of angiogenesis.

| Gene                             | Class Name | Accession Number | Gene                | Class Name | Accession Number |
|----------------------------------|------------|------------------|---------------------|------------|------------------|
| ACKR1 (DARC)                     | Endogenous | NM_002036.3      | KDR (VEGFR2, FLK1)  | Endogenous | NM_002253        |
| ACVR1 (ALK2)                     | Endogenous | NM_001105.4      | LAMA4               | Endogenous | NM_002290.4      |
| ACVRL1 (ALK1)                    | Endogenous | NM_000020.2      | LOXL2               | Endogenous | NM_002318.2      |
| ADAMTS-1                         | Endogenous | NM_006988.4      | MAPK14 (p38/MAPK)   | Endogenous | NM_139012.2      |
| ADAMTS-9                         | Endogenous | NM_182920.1      | MET (c-Met)         | Endogenous | NM_001127500.2   |
| AMOTL2                           | Endogenous | NM_016201.3      | MMP2                | Endogenous | NM_004530        |
| ANG (Angiogenin)                 | Endogenous | NM_001145.4      | MMP9                | Endogenous | NM_004994        |
| ANGPT1 (Ang1)                    | Endogenous | NM_001146        | NAA15 (Tubedown-1)  | Endogenous | NM_057175.4      |
| ANGPT2 (Ang2)                    | Endogenous | NM_001147        | NFE2L2 (NRF2)       | Endogenous | NM_006164.4      |
| Apelin (APLN)                    | Endogenous | NM_017413        | NID1 (Nidogen-1)    | Endogenous | NM_002508.2      |
| APLNR (APJ)                      | Endogenous | NM_005161        | NOS3 (eNOS)         | Endogenous | NM_000603.4      |
| BAX                              | Endogenous | NM_001291428     | Notch1              | Endogenous | NM_017617        |
| BMPR1A (ALK3)                    | Endogenous | NM_004329.2      | NOTCH3              | Endogenous | NM_000435        |
| CCL2 (MCP1)                      | Endogenous | NM_002982.3      | NRARP               | Endogenous | NM_001004354     |
| CCL5 (RANTES)                    | Endogenous | NM_002985        | NRCAM               | Endogenous | NM_001193582     |
| CD34                             | Endogenous | NM_001773        | NRP1                | Endogenous | NM_003873        |
| CD36                             | Endogenous | NM_001001548     | NTN1 (Netrin-1)     | Endogenous | NM_004822.2      |
| CDC42                            | Endogenous | NM_044472.2      | PDGFA               | Endogenous | NM_002607        |
| CDH2 (N-Cadherin)                | Endogenous | NM_001792        | PDGFB               | Endogenous | NM_002608        |
| CDH5 (VE-cadherin)               | Endogenous | NM_001795.4      | PDGFR-beta          | Endogenous | NM_001355017     |
| Col IV                           | Endogenous | NM_001845        | PECAM1 (CD31)       | Endogenous | NM_000442        |
| CTNNB1                           | Endogenous | NM_001904        | PFKFB3              | Endogenous | NM_004566.3      |
| CTSS (Cathepsin S)               | Endogenous | NM_004079.4      | PLAT (t-PA)         | Endogenous | NM_000930.4      |
| CXCL12 (SDF-1A)                  | Endogenous | NM_199168.3      | PLAUR (uPAR)        | Endogenous | NM_002659.3      |
| CXCR4                            | Endogenous | NM_001008540     | PLXND1 (PlexinD1)   | Endogenous | NM_015103.2      |
| CYR61                            | Endogenous | NM_001554.4      | RAMP2               | Endogenous | NM_005854.2      |
| DLL4                             | Endogenous | NM_019074        | RGS5                | Endogenous | NM_003617        |
| EDNRB                            | Endogenous | NM_001201397.1   | ROBO4               | Endogenous | NM_019055.5      |
| EGFL7                            | Endogenous | NM_201446.2      | S1PR1 (S1P1, EDG11) | Endogenous | NM_001400.4      |
| EGLN1 (PHD2)                     | Endogenous | NM_022051.2      | SELP                | Endogenous | NM_003005.3      |
| Endoglin (CD105)                 | Endogenous | NM_001114753     | SEMA3E              | Endogenous | NM_012431.2      |
| EPHB4                            | Endogenous | NM_004444.4      | SERPINE1 (PAI-1)    | Endogenous | NM_000602.4      |
| ERG                              | Endogenous | NM_182918        | SRF                 | Endogenous | NM_001292001.1   |
| ESM1                             | Endogenous | NM_007036.4      | TEK (TIE2)          | Endogenous | NM_000459        |
| ETS1                             | Endogenous | NM_005238        | TGFB1               | Endogenous | NM_000660        |
| F3 (Tissue Factor)               | Endogenous | NM_001993.4      | TIE1                | Endogenous | NM_005424        |
| FGF2 (bFGF)                      | Endogenous | NM_002006.5      | TJP1 (ZO-1)         | Endogenous | NM_003257.4      |
| FGFR1 (Flt-2)                    | Endogenous | NM_023110.2      | TNFSF11 (RANKL)     | Endogenous | NM_003701.3      |
| FLT1 (VEGFR1)                    | Endogenous | NM_002019        | TP53                | Endogenous | NM_000546        |
| FLT4 (VEGFR3)                    | Endogenous | NM_182925.4      | UNC5B               | Endogenous | NM_170744.4      |
| HES1                             | Endogenous | NM_005524.3      | VCAM1               | Endogenous | NM_001078.3      |
| HIF1a                            | Endogenous | NM_001530        | VEGFA               | Endogenous | NM_001171623     |
| HSPB1 (HSP27)                    | Endogenous | NM_001540.4      | VEGFC               | Endogenous | NM_005429        |
| ICAM2                            | Endogenous | NM_001099786     | VEGFD               | Endogenous | NM_004469        |
| ID1                              | Endogenous | NM_002165.3      | VWF                 | Endogenous | NM_000552.4      |
| ID2 (Inhibitor of DNA binding 2) | Endogenous | NM_002166.4      | WNT5A               | Endogenous | NM_001256105.1   |
| ITGAV (Integrin AlphaVbeta3)     | Endogenous | NM_002210.4      | WNT7B               | Endogenous | NM_058238        |
| ITGB1BP1 (ICAP1)                 | Endogenous | NM_004763.4      | HPRT1               | Reference  | NM_000194.2      |
| Jag1                             | Endogenous | NM_000214        | YWHAZ               | Reference  | NM_003406.3      |
| KCNE3                            | Endogenous | NM_005472.4      | B2M                 | Reference  | NM_004048.2      |

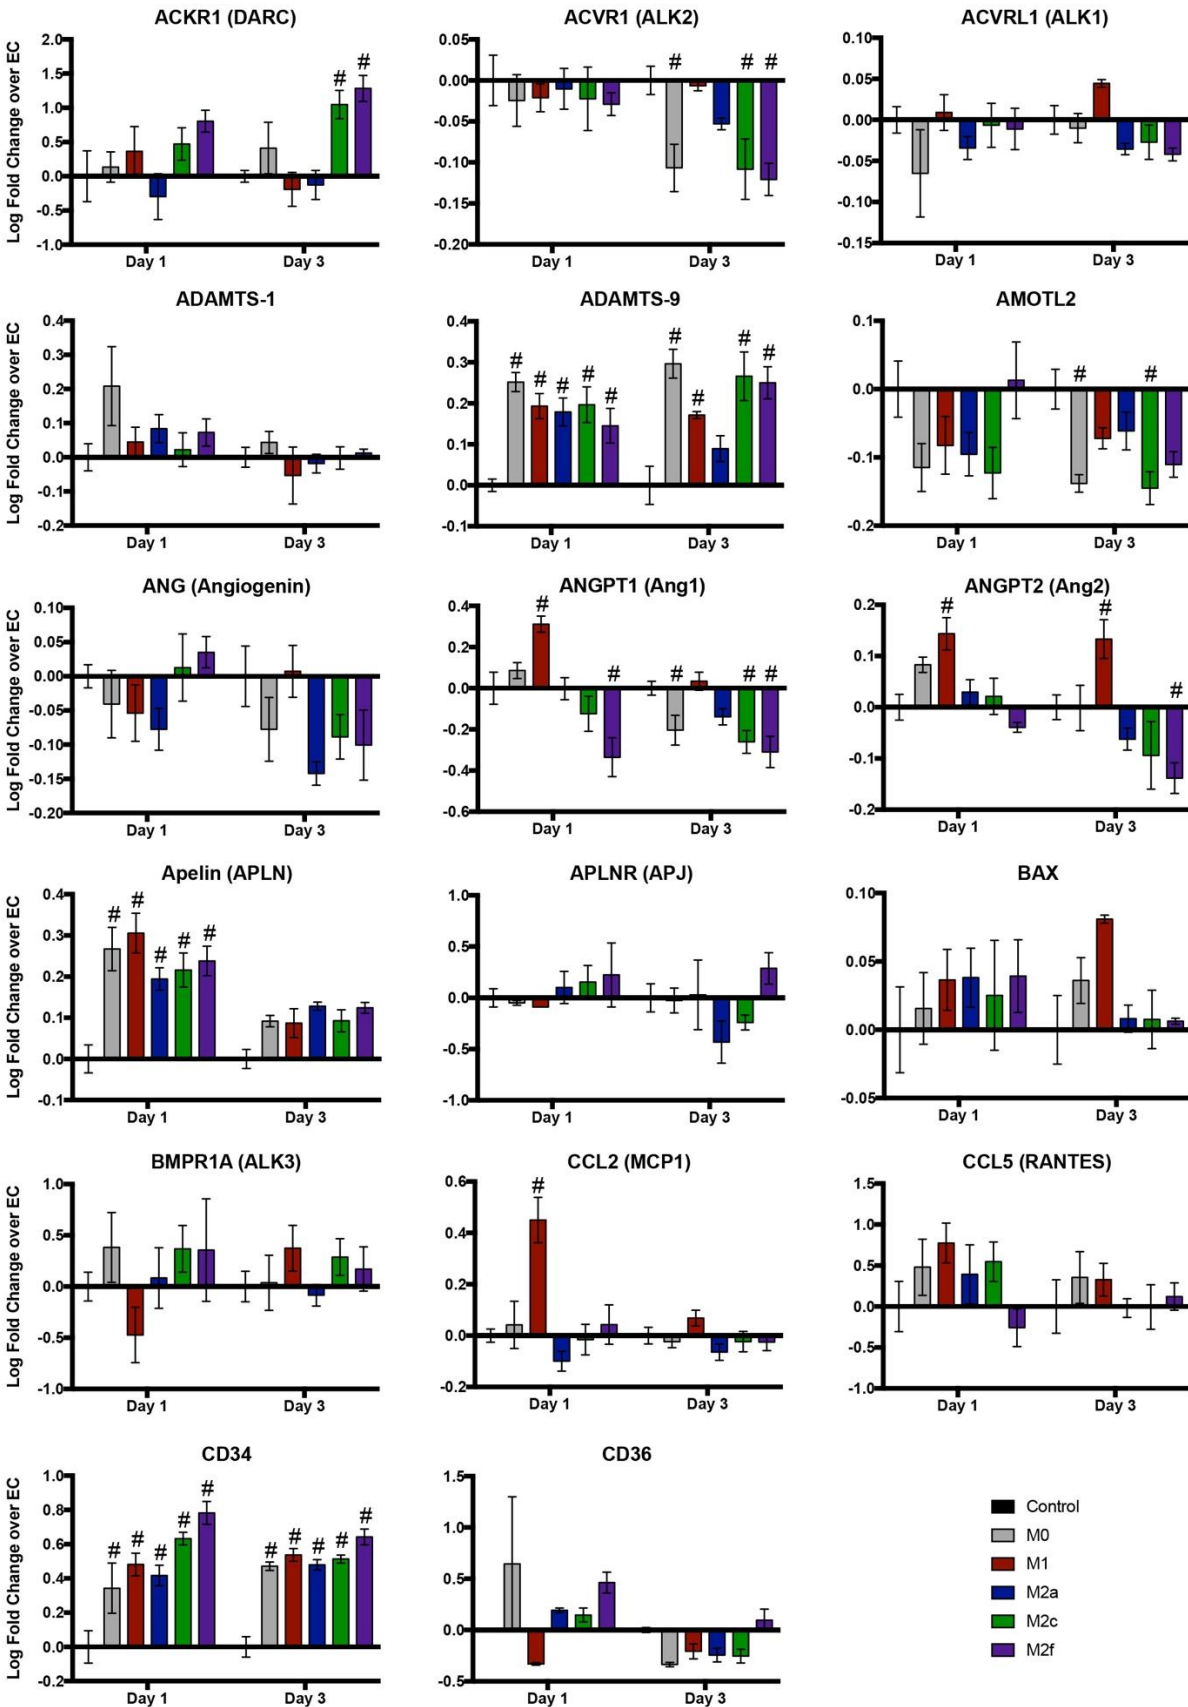

**Figure S1. Individual gene plots of markers used to characterize phenotype-induced changes in EC behavior.** Data analyzed using two-way ANOVA. Post-hoc analysis performed using the two-stage linear step-up method of Benjamini, Krieger and Yekutieli with  $Q=0.05$ . Data shown as mean  $\pm$  SEM;  $n = 4$  biological replicates per phenotype and # indicates significance relative to control.

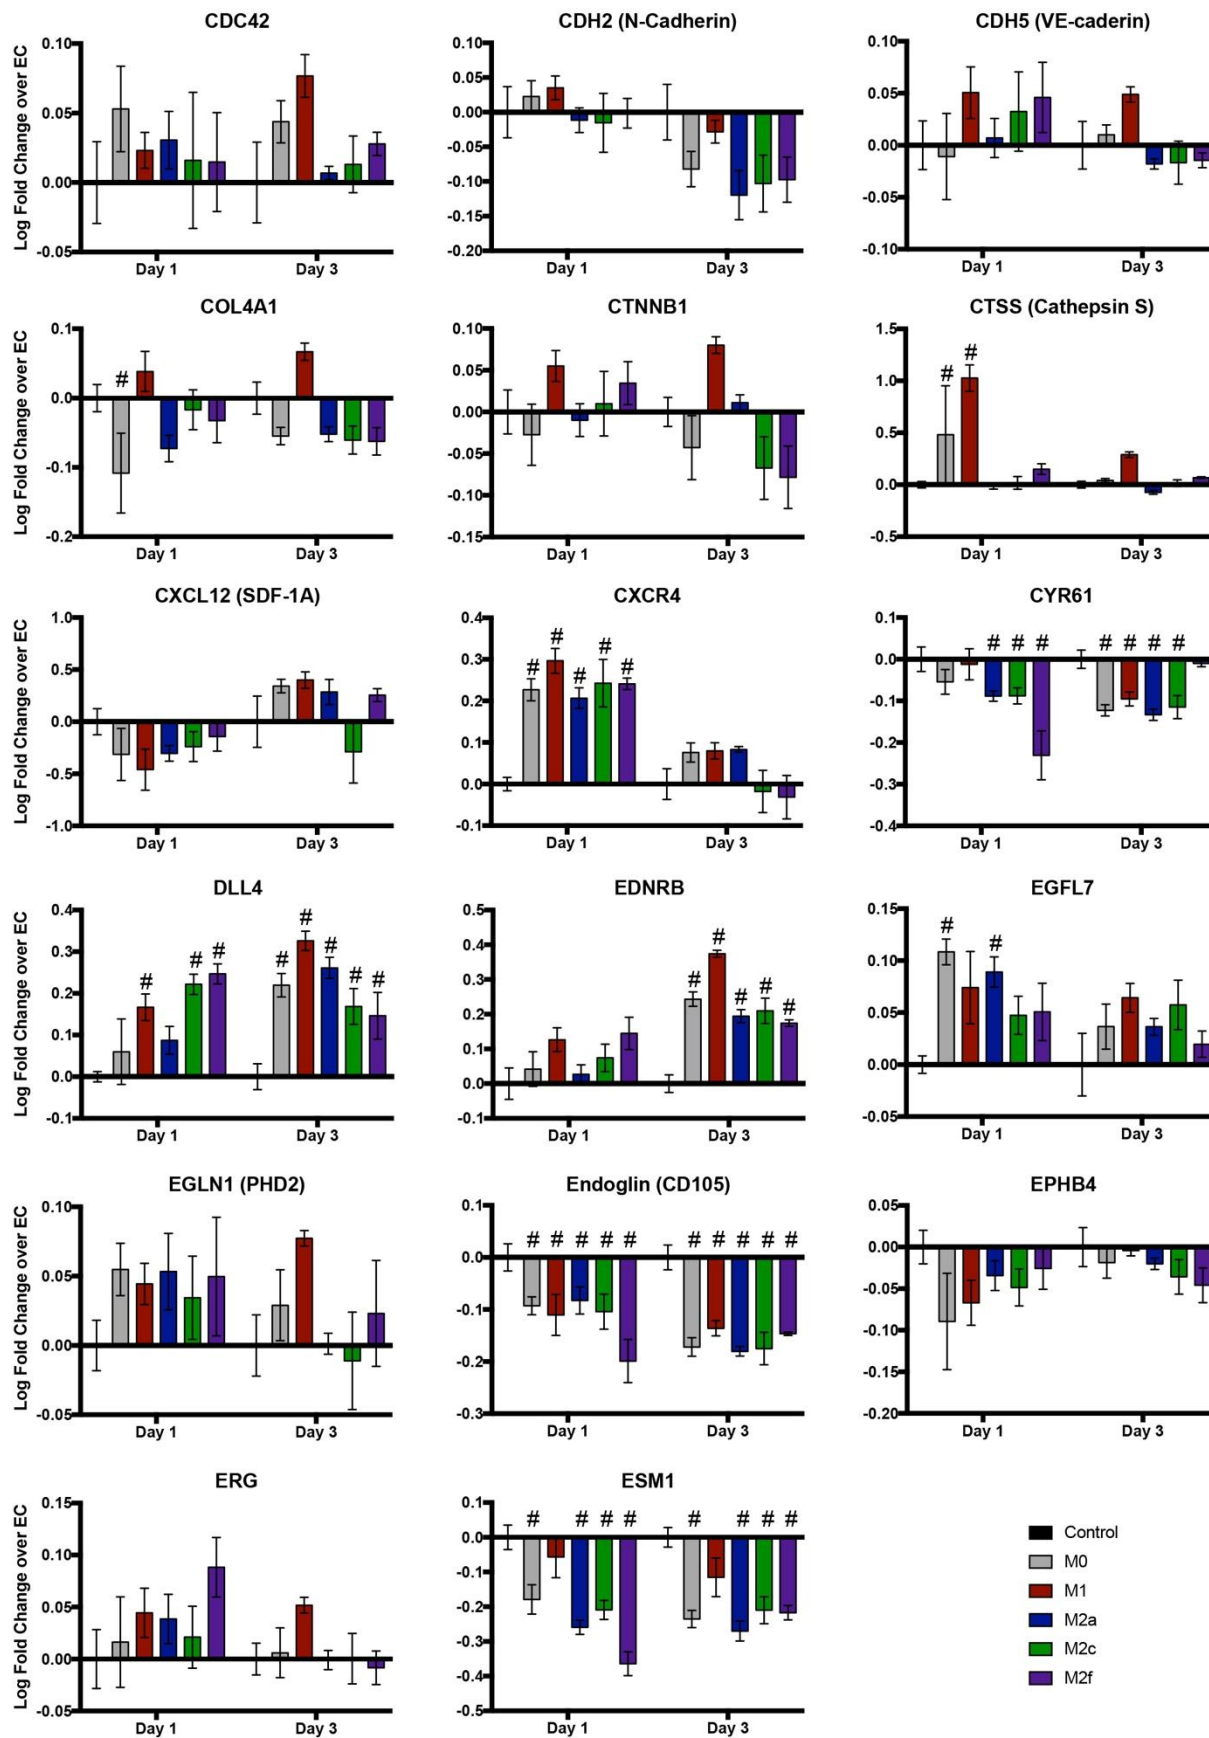

**Figure S1. (continued)** Data analyzed using two-way ANOVA. Post-hoc analysis performed using the two-stage linear step-up method of Benjamini, Krieger and Yekutieli with  $Q=0.05$ . Data shown as mean  $\pm$  SEM;  $n = 4$  biological replicates per phenotype and # indicates significance relative to control.

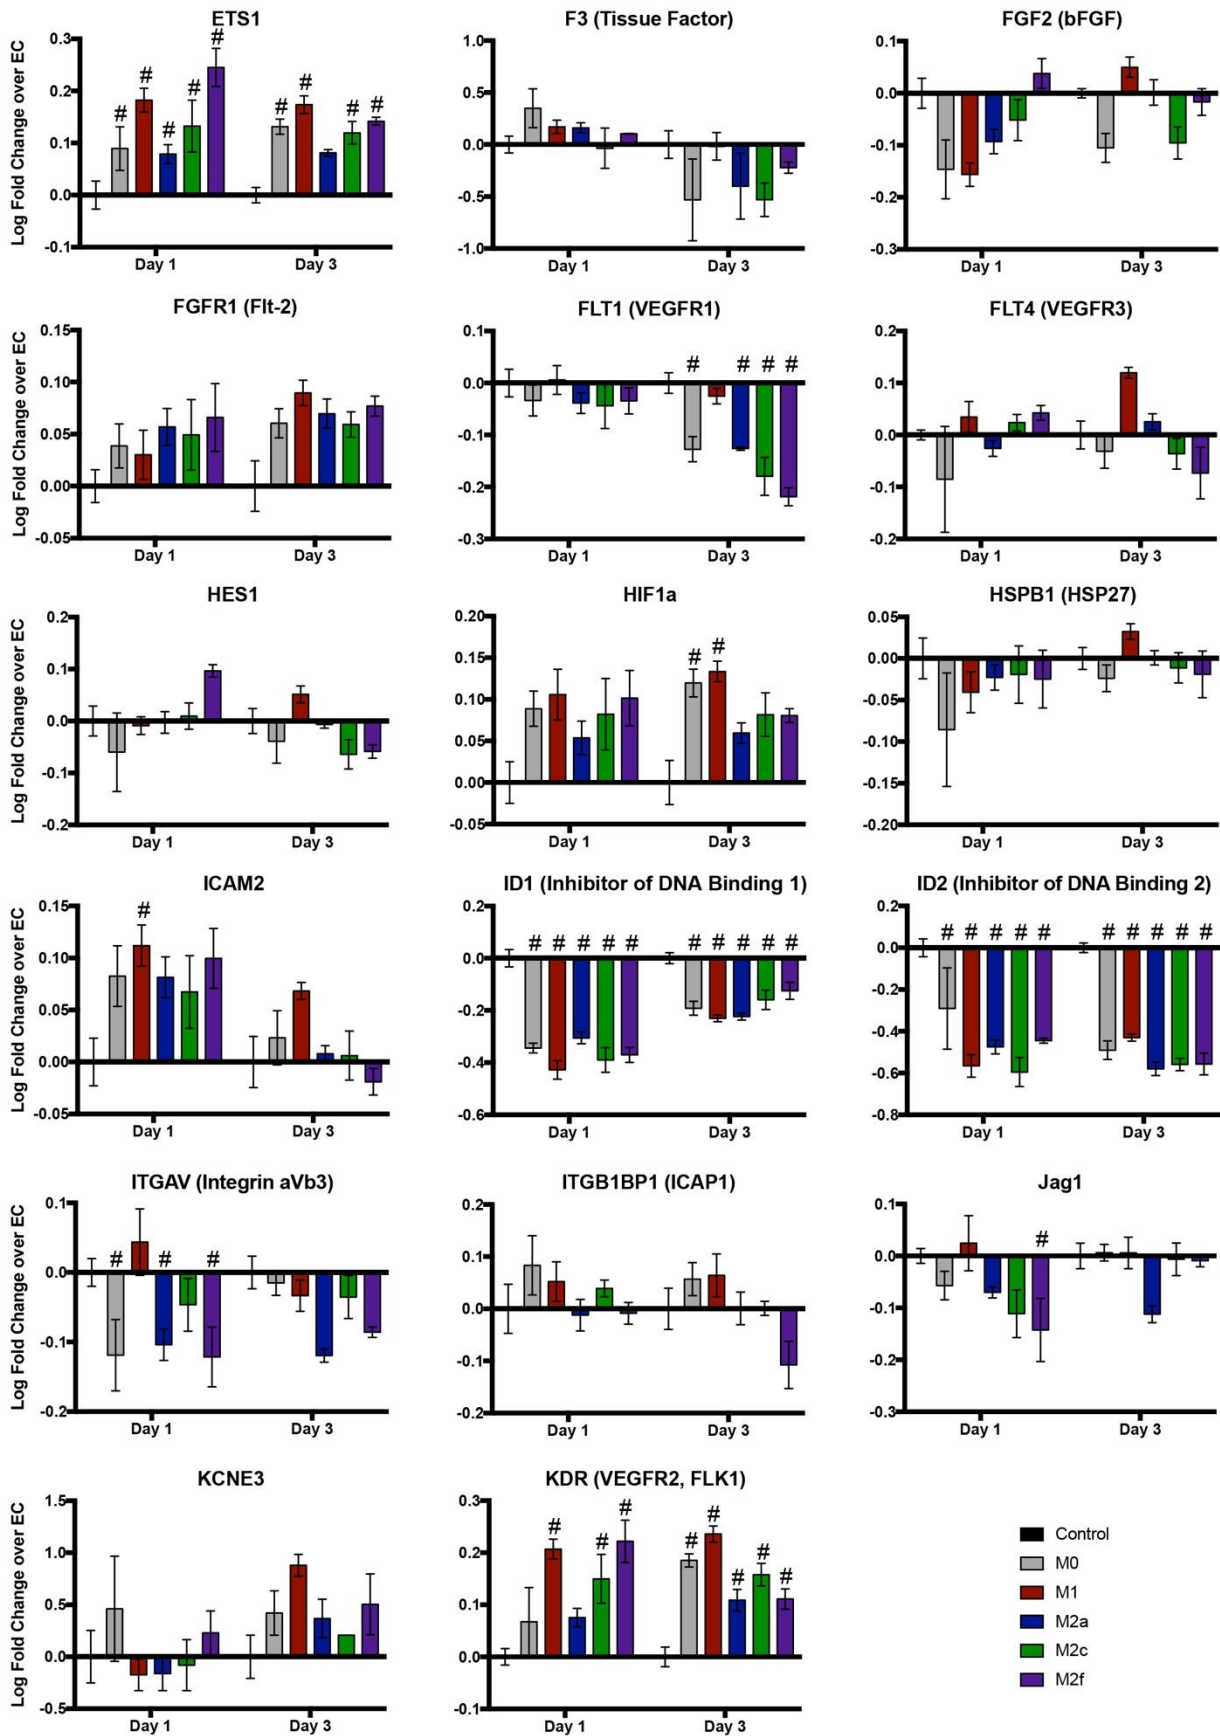

**Figure S1. (continued)** Data analyzed using two-way ANOVA. Post-host analysis performed using the two-stage linear step-up method of Benjamini, Krieger and Yekutieli with  $Q=0.05$ . Data shown as mean  $\pm$  SEM;  $n = 4$  biological replicates per phenotype and # indicates significance relative to control.

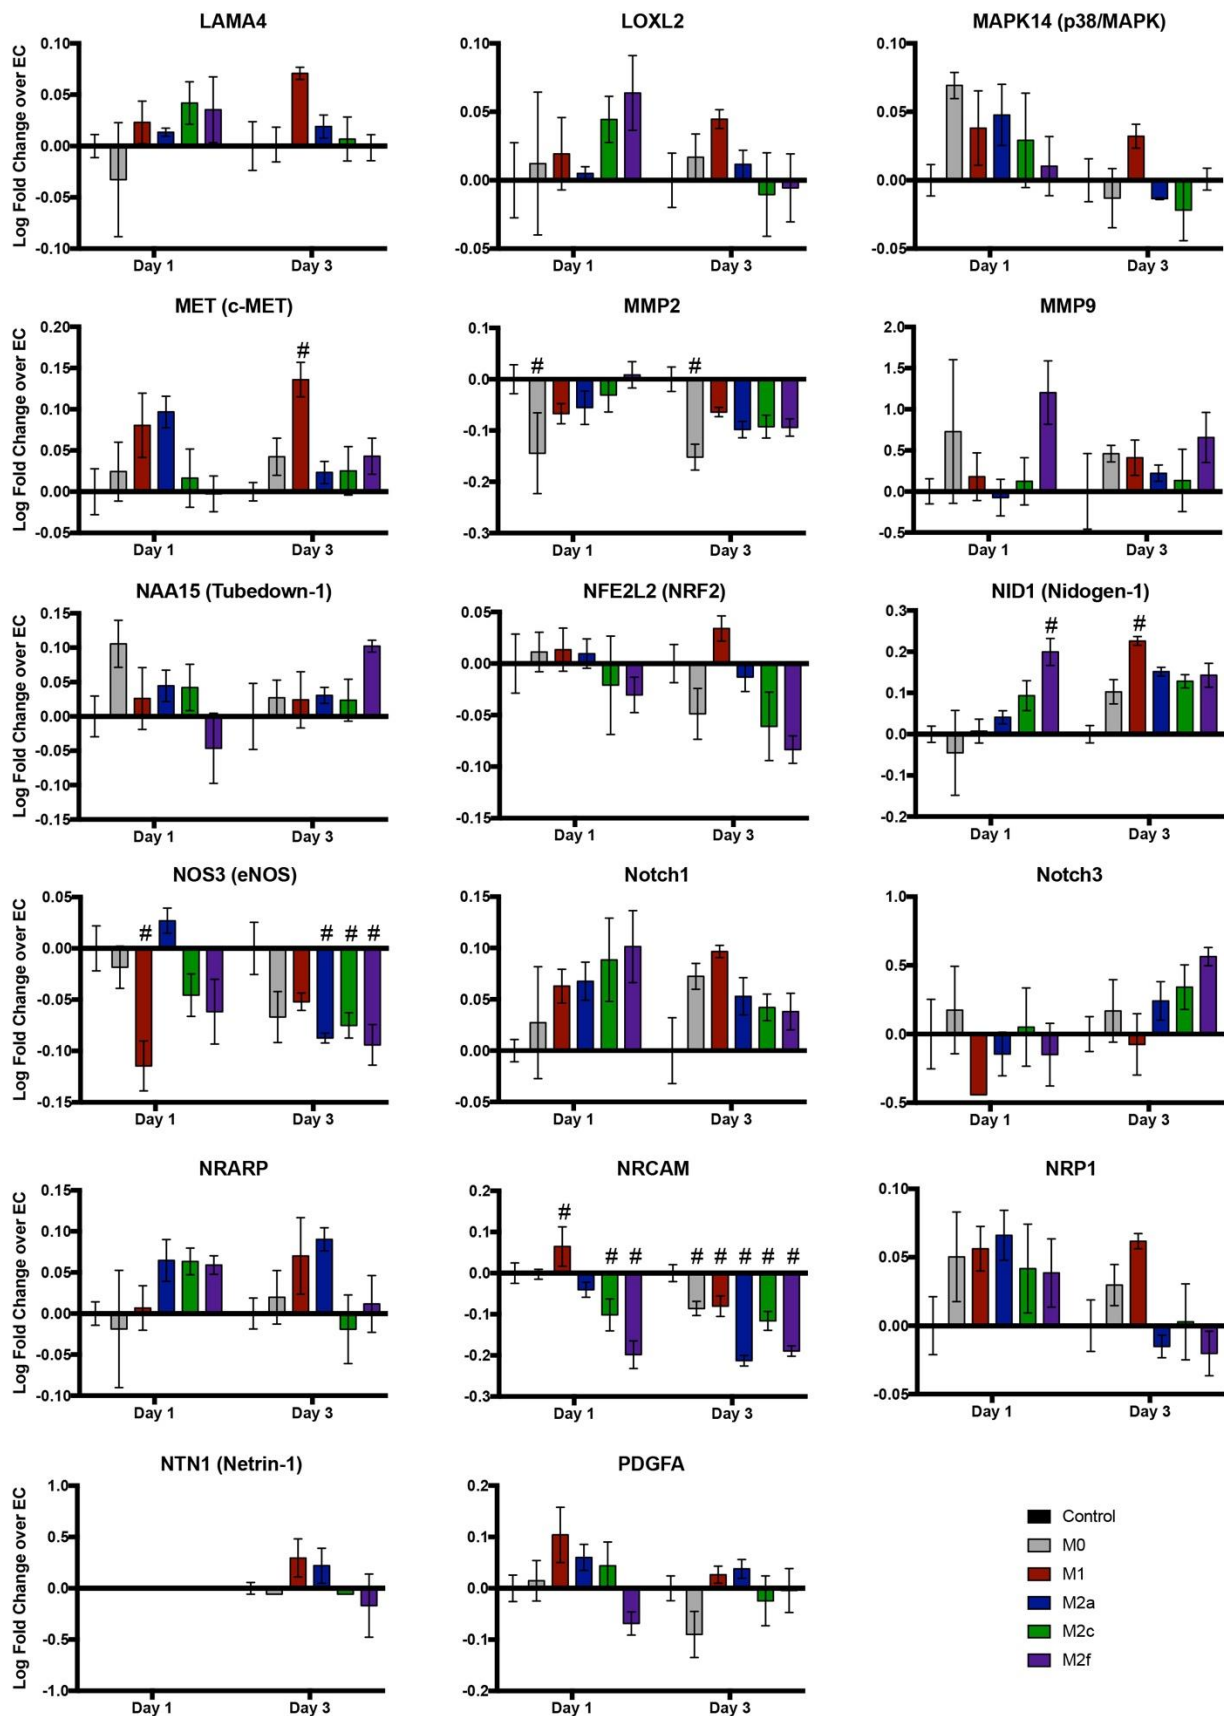

**Figure S1. (continued)** Data analyzed using two-way ANOVA. Post-host analysis performed using the two-stage linear step-up method of Benjamini, Krieger and Yekutieli with  $Q=0.05$ . Data shown as mean  $\pm$  SEM;  $n = 4$  biological replicates per phenotype and # indicates significance relative to control.



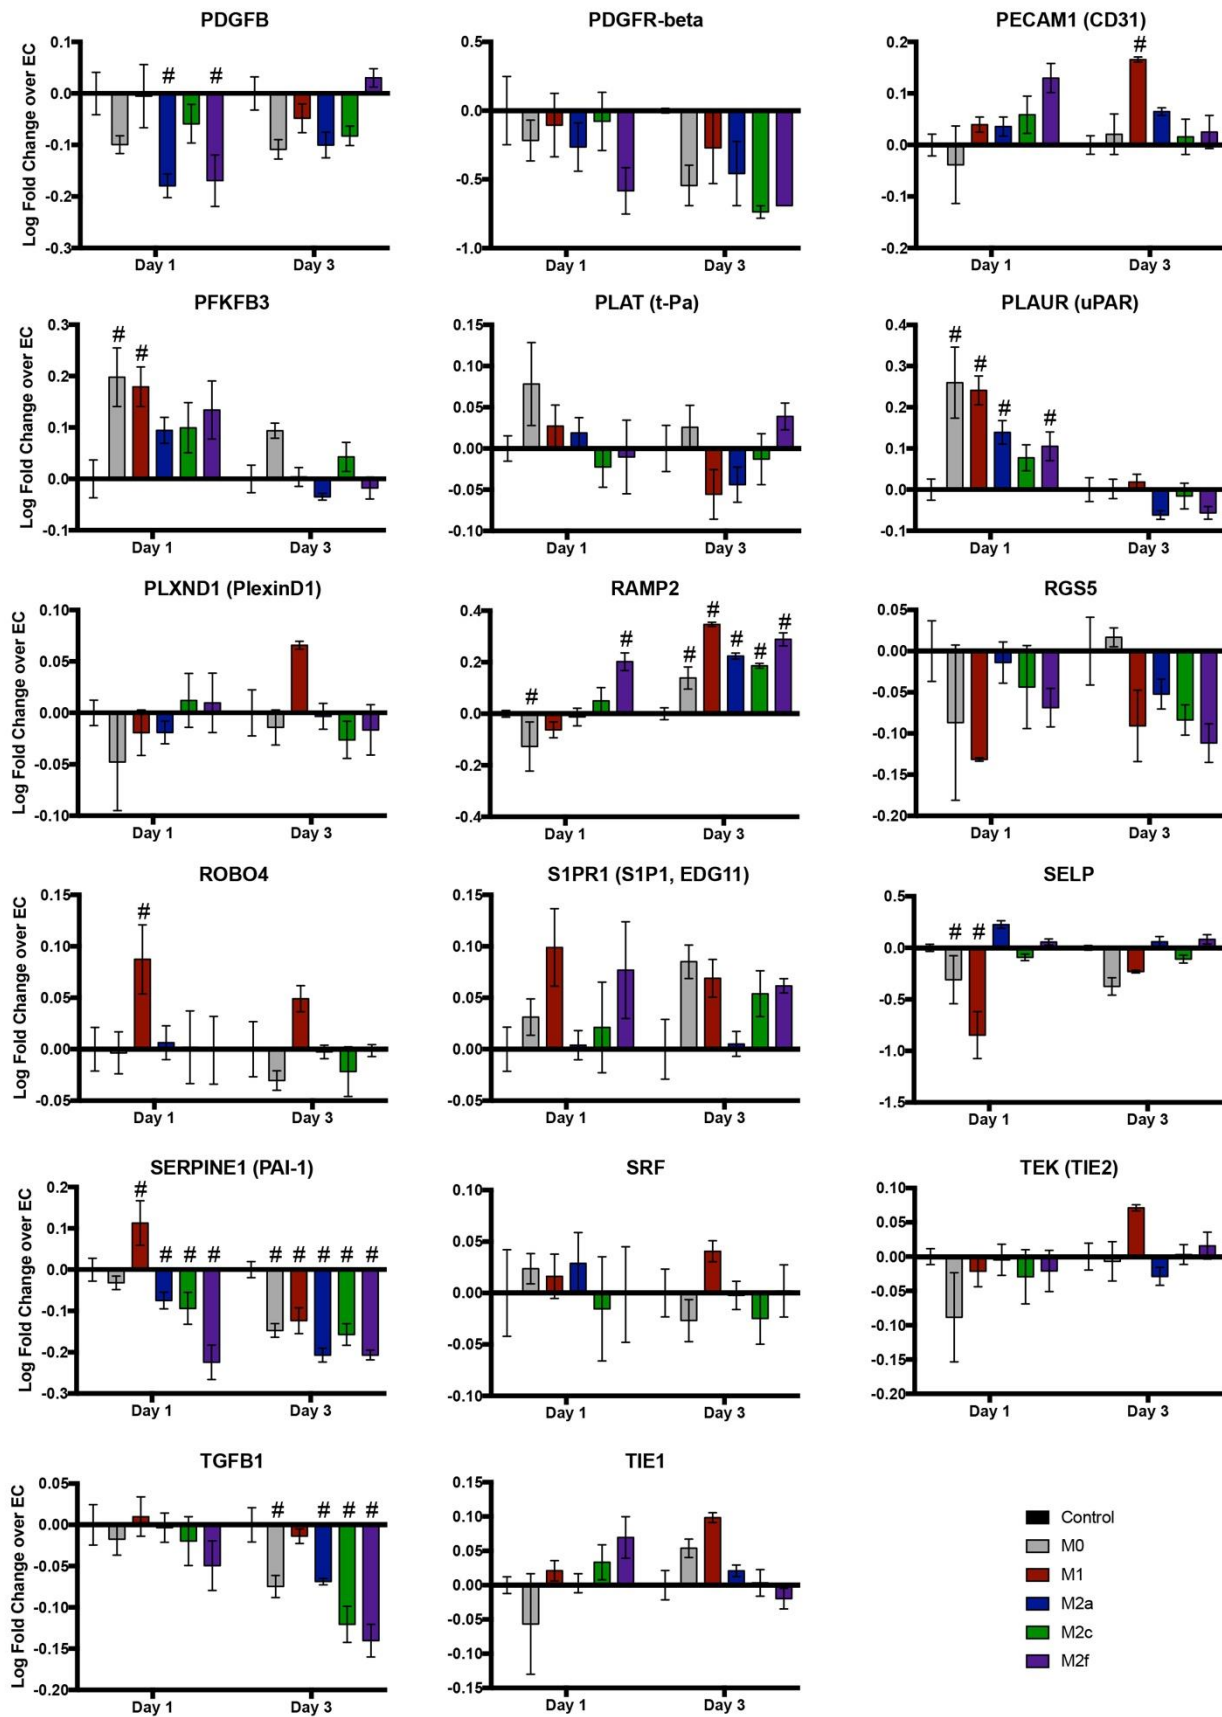

**Figure S1. (continued)** Data analyzed using two-way ANOVA. Post-hoc analysis performed using the two-stage linear step-up method of Benjamini, Krieger and Yekutieli with  $Q=0.05$ . Data shown as mean  $\pm$  SEM;  $n = 4$  biological replicates per phenotype and # indicates significance relative to control.

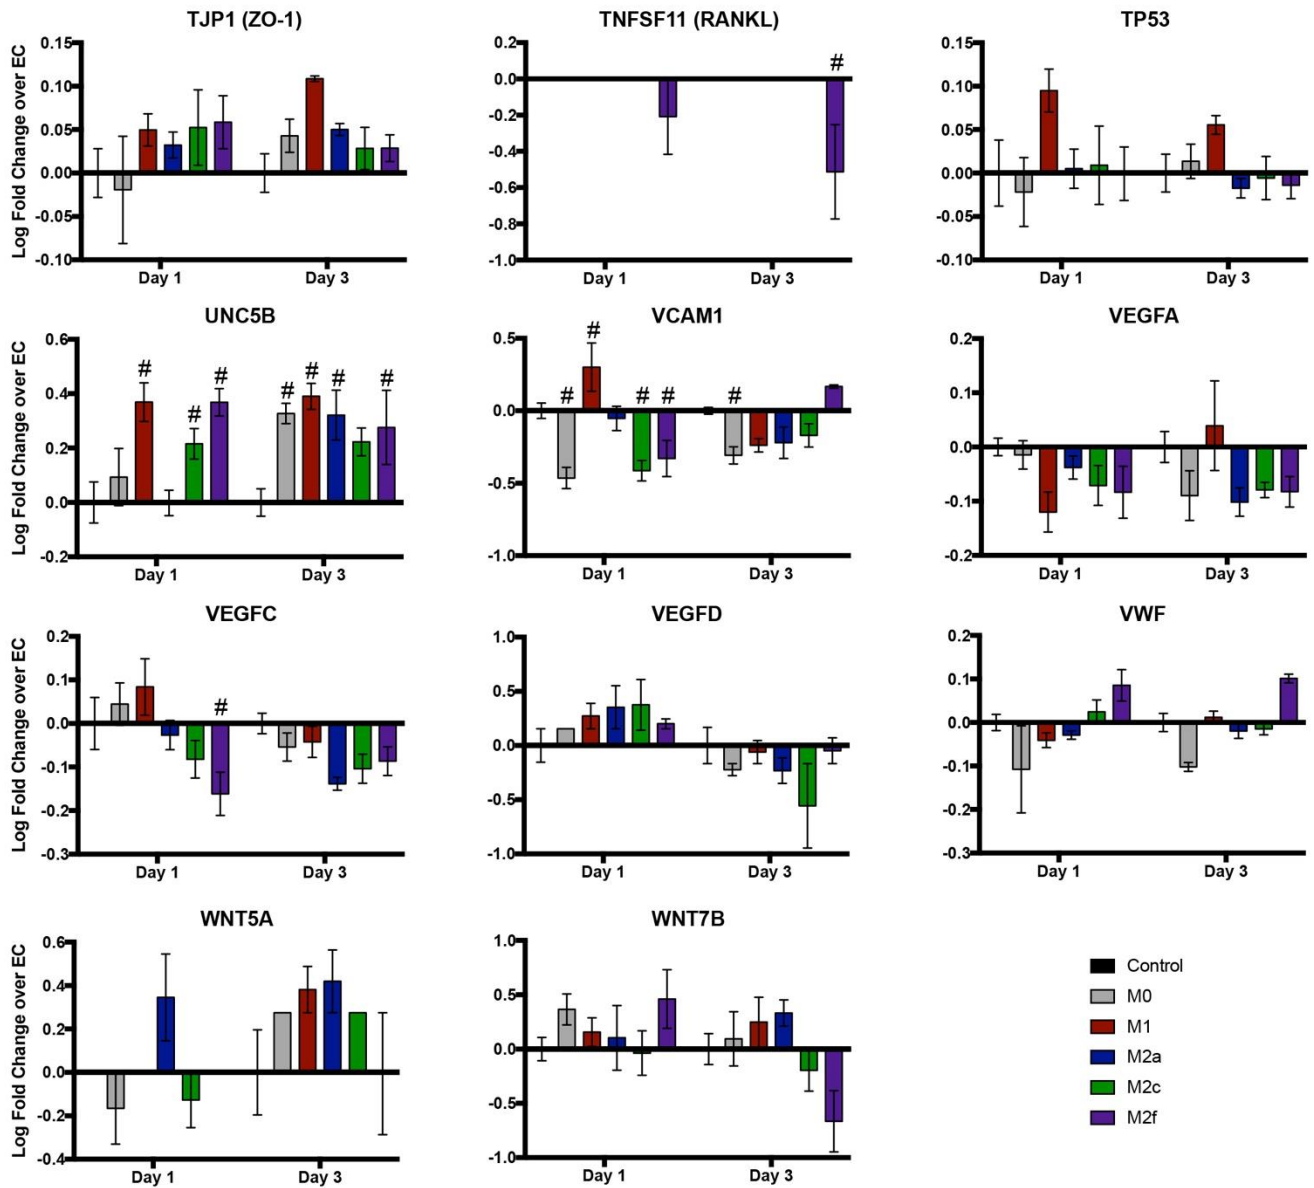

**Figure S1. (continued)** Data analyzed using two-way ANOVA. Post-host analysis performed using the two-stage linear step-up method of Benjamini, Krieger and Yekutieli with  $Q=0.05$ . Data shown as mean  $\pm$  SEM;  $n = 4$  biological replicates per phenotype and # indicates significance relative to control.



**Table S2. Endothelial cell genes significantly up-regulated or down-regulated when co-cultured with macrophages of different phenotypes.** Data were analyzed using two-way ANOVA. Post-host analysis was performed using the two-stage linear step-up method of Benjamini, Krieger and Yekutieli with Q=0.05 to control for the number of false positives resulting from multiple comparisons; (n = 4 donors).

**UPREGULATED**

| DAY 1    |          |          |          |          | DAY 3    |          |       |          |          |
|----------|----------|----------|----------|----------|----------|----------|-------|----------|----------|
| M0       | M1       | M2a      | M2c      | M2f      | M0       | M1       | M2a   | M2c      | M2f      |
| ADAMTS-9 | CD34  | ACKR1    | ACKR1    |
| Apelin   | ANGPT1   | Apelin   | Apelin   | Apelin   | CD34     | ANGPT2   | DLL4  | ADAMTS-9 | ADAMTS-9 |
| CD34     | ANGPT2   | CD34     | CD34     | CD34     | DLL4     | CD34     | EDNRB | CD34     | CD34     |
| CTSS     | CD34     | CXCR4    | CXCR4    | CXCR4    | EDNRB    | DLL4     | KDR   | DLL4     | DLL4     |
| CXCR4    | Apelin   | EGFL7    | DLL4     | DLL4     | ETS1     | EDNRB    | RAMP2 | EDNRB    | EDNRB    |
| EGFL7    | CCL2     | ETS1     | ETS1     | ETS1     | HIF1a    | ETS1     | UNC5B | ETS1     | ETS1     |
| ETS1     | CTSS     | PLAUR    | KDR      | KDR      | KDR      | HIF1a    |       | KDR      | KDR      |
| PFKFB3   | CXCR4    |          | UNC5B    | NID1     | RAMP2    | KDR      |       | RAMP2    | RAMP2    |
| PLAUR    | DLL4     |          |          | PLAUR    | UNC5B    | MET      |       |          | UNC5B    |
|          | ETS1     |          |          | RAMP2    |          | NID1     |       |          |          |
|          | ICAM2    |          |          | UNC5B    |          | PECAM1   |       |          |          |
|          | KDR      |          |          |          |          | RAMP2    |       |          |          |
|          | NRCAM    |          |          |          |          | UNC5B    |       |          |          |
|          | PFKFB3   |          |          |          |          |          |       |          |          |
|          | PLAUR    |          |          |          |          |          |       |          |          |
|          | ROBO4    |          |          |          |          |          |       |          |          |
|          | SERPINE1 |          |          |          |          |          |       |          |          |
|          | UNC5B    |          |          |          |          |          |       |          |          |
|          | VCAM1    |          |          |          |          |          |       |          |          |

**DOWNREGULATED**

| DAY 1    |          |          |          |          | DAY 3    |          |          |          |          |
|----------|----------|----------|----------|----------|----------|----------|----------|----------|----------|
| M0       | M1       | M2a      | M2c      | M2f      | M0       | M1       | M2a      | M2c      | M2f      |
| COL4A1   | Endoglin | CYR61    | CYR61    | ANGPT1   | ACVR1    | CYR61    | CYR61    | ACVR1    | ACVR1    |
| Endoglin | FGF2     | Endoglin | Endoglin | CYR61    | AMOTL2   | Endoglin | Endoglin | AMOTL2   | ANGPT1   |
| ESM1     | ID1      | ESM1     | ESM1     | Endoglin | ANGPT1   | ID1      | ESM1     | ANGPT1   | ANGPT2   |
| FGF2     | ID2      | FGF2     | ID1      | ESM1     | CYR61    | ID2      | FLT1     | CYR61    | Endoglin |
| ID1      | NOS3     | ID1      | ID2      | ID1      | Endoglin | NRCAM    | ID1      | Endoglin | ESM1     |
| ID2      | SELP     | ID2      | NRCAM    | ID2      | ESM1     | SERPINE1 | ID2      | ESM1     | FLT1     |
| ITGAV    |          | ITGAV    | SERPINE1 | ITGAV    | FLT1     |          | NOS3     | FLT1     | ID1      |
| MMP2     |          | PDGFB    | VCAM1    | Jag1     | ID1      |          | NRCAM    | ID1      | ID2      |
| RAMP2    |          | SERPINE1 |          | NRCAM    | ID2      |          | SERPINE1 | ID2      | NOS3     |
| SELP     |          |          |          | PDGFB    | MMP2     |          | TGFB1    | NOS3     | NRCAM    |
| VCAM1    |          |          |          | SERPINE1 | NRCAM    |          |          | NRCAM    | SERPINE1 |
|          |          |          |          | VCAM1    | SERPINE1 |          |          | SERPINE1 | TGFB1    |
|          |          |          |          | VEGFC    | TGFB1    |          |          | TGFB1    | TNFSF11  |
|          |          |          |          |          | VCAM1    |          |          |          |          |

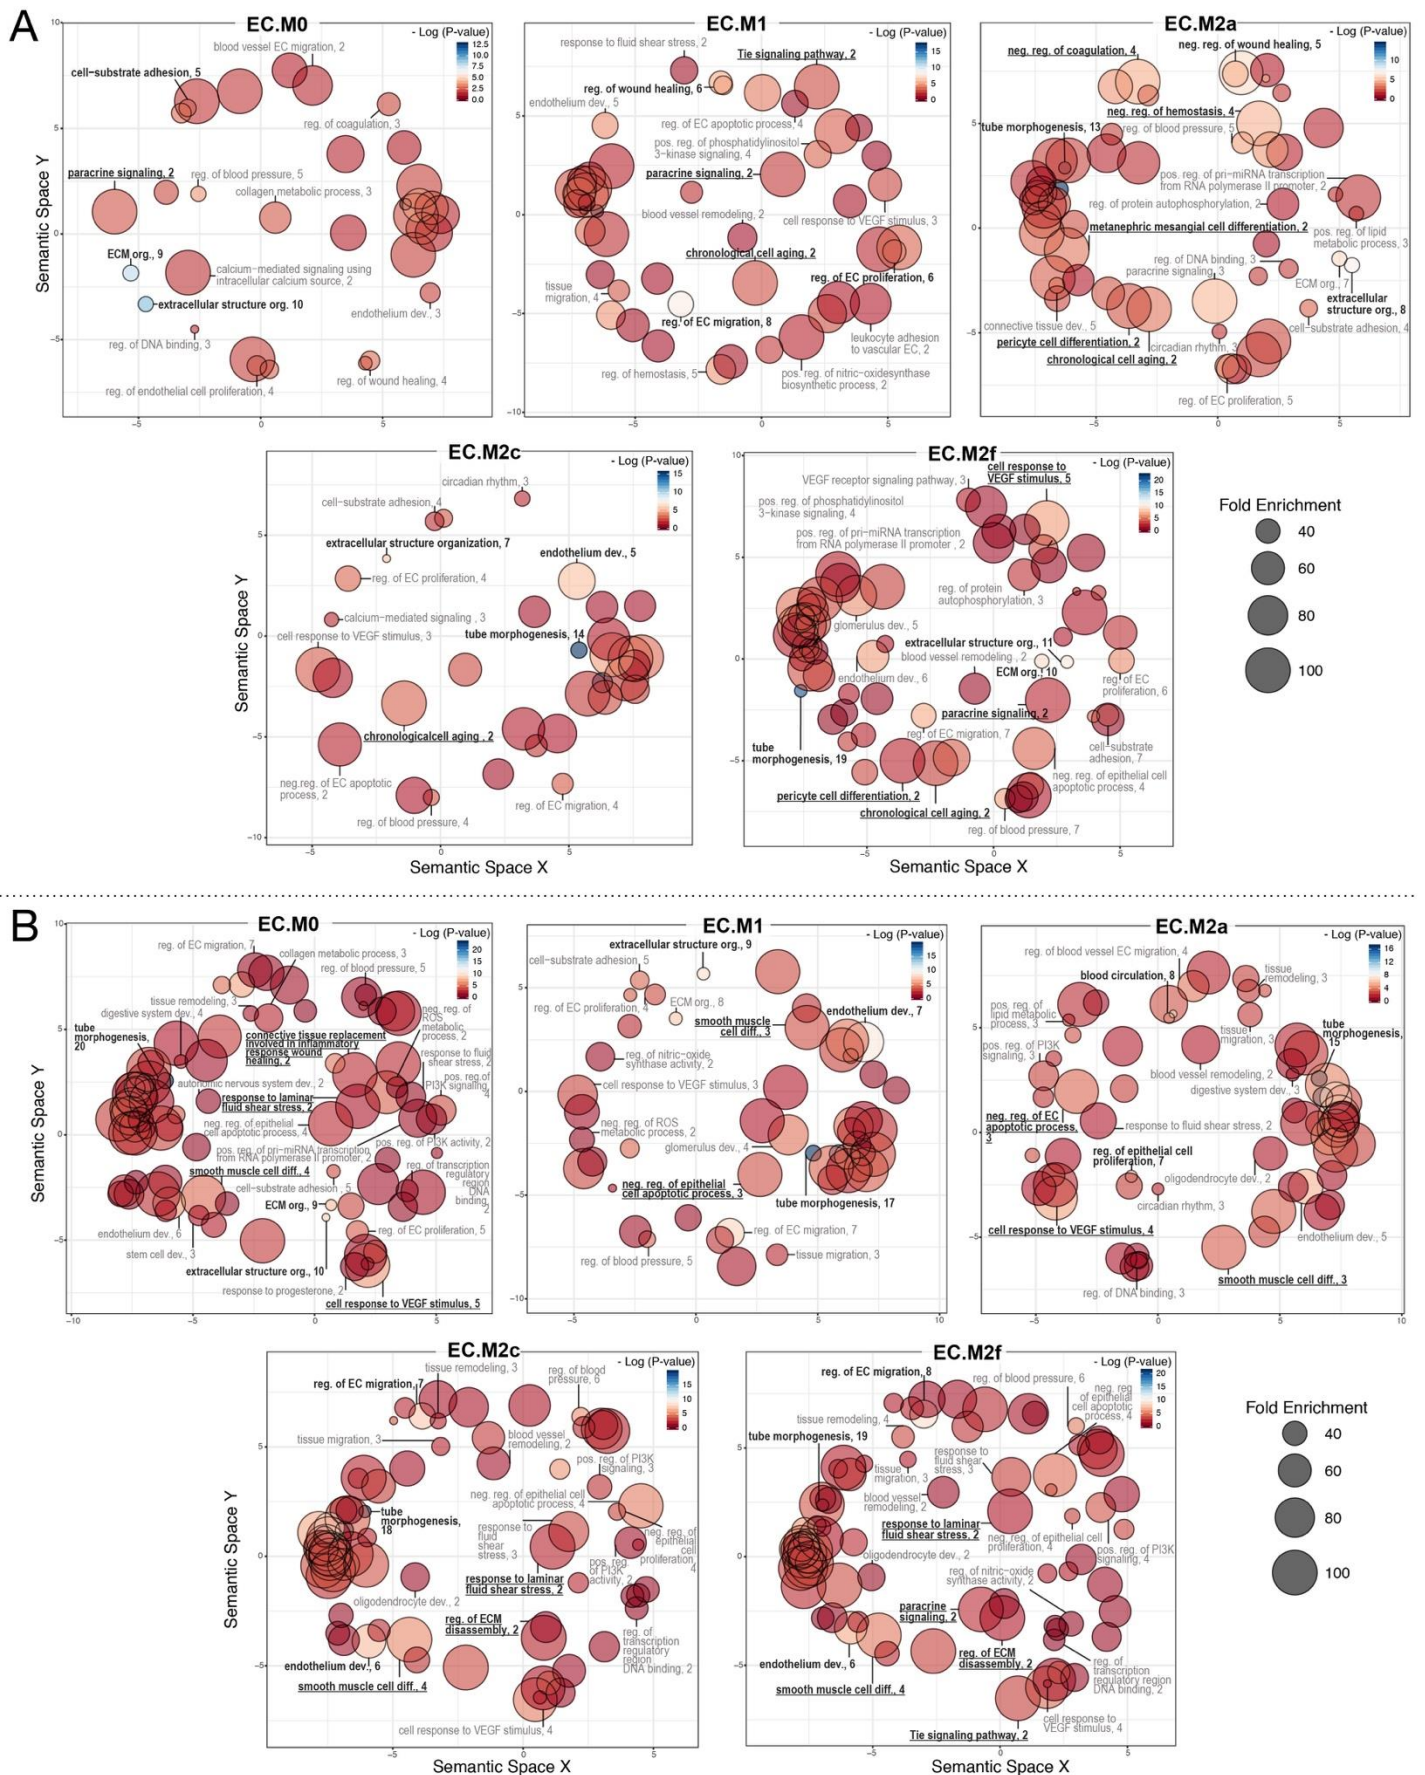

in semantic space such that overlapping terms have gene products with similar biological functions. Larger circles indicated greater enrichment. The top 3 terms for each phenotype with  $p$ -value  $< 0.001$  are indicated in black, and all terms with fold enrichment  $\geq 100$  and  $p < 0.01$  are indicated in black and underlined. All other non-dispensable terms are shown in gray; numbers correspond to the number of genes associated with each term.

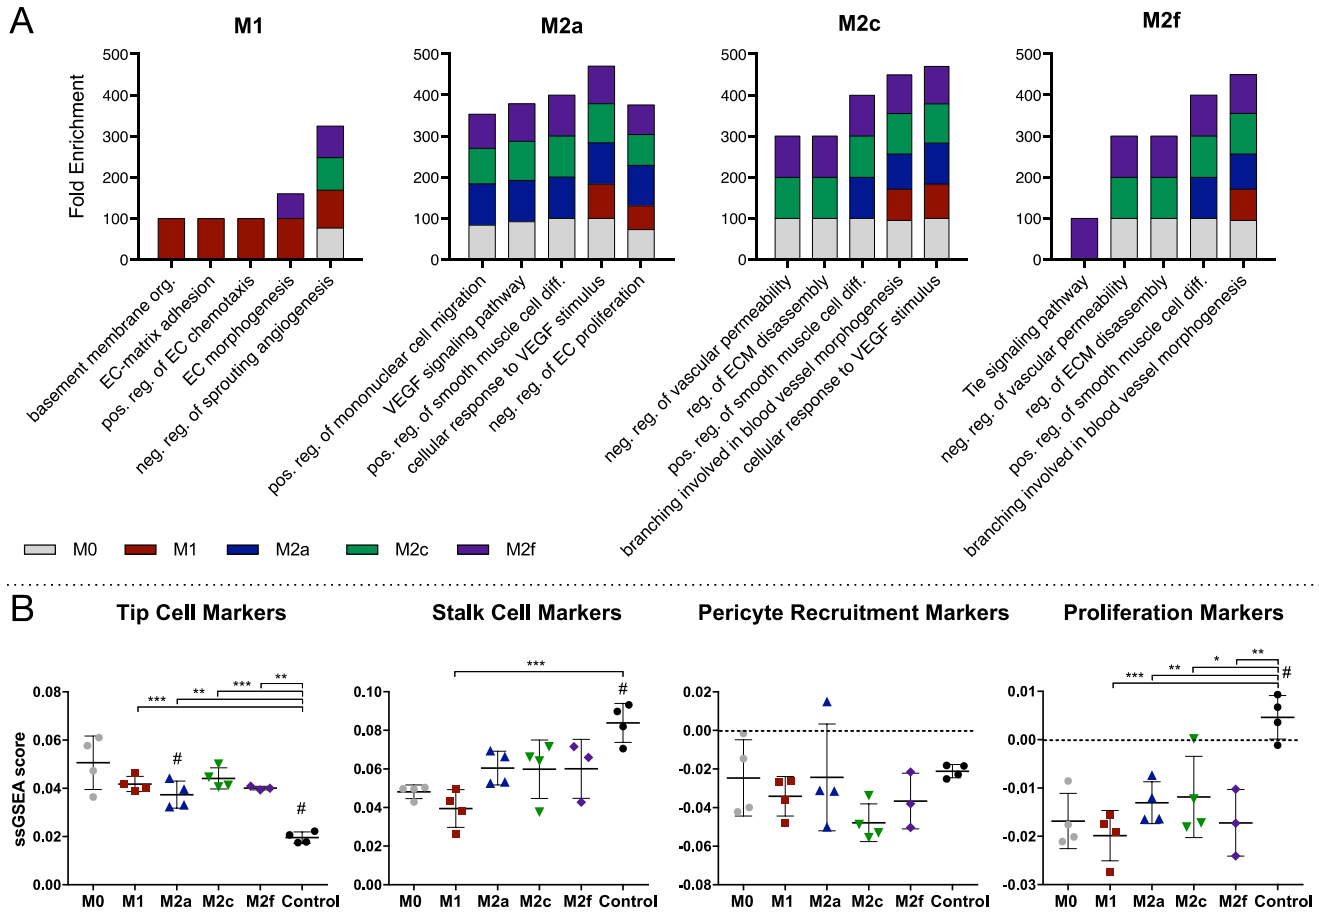

**Figure S3. Effects of macrophage phenotype on biological processes in ECs after 3 days of transwell co-culture.** Gene ontology enrichment analysis was performed on lists of genes differentially regulated in ECs in response to macrophage phenotype after 3 days of co-culture. **(A)** Top 5 most highly enriched, non-redundant GO terms for each phenotype. **(B)** Single-sample Gene Set Enrichment Analysis (ssGSEA) for gene sets related to specific processes of angiogenesis; analysis was not restricted to only differentially expressed genes. One-way ANOVA with Tukey's post-hoc analysis; \* $p < 0.05$ , \*\* $p < 0.01$ , \*\*\* $p < 0.001$ , # indicates  $p < 0.05$  relative to the M0 control.

**Table S3. Lists of genes associated with angiogenic processes.** Genes were selected and organized based on a literature search of various stages of angiogenesis.

| Tip Cell           | Stalk Cell    | Migration                             | Proliferation      |
|--------------------|---------------|---------------------------------------|--------------------|
| ADAMTS-1           | ACKR1 (DARC)  | AMOTL2                                | Apelin (APLN)      |
| ADAMTS-9           | ACVRL1 (ALK1) | ANGPT1 (Ang1)                         | AMOTL2             |
| ANGPT2             | APLNR (APJ)   | CCL2                                  | ANG                |
| Apelin (APLN)      | CD36          | CCN1 (CYR61)                          | APLNR (APJ)        |
| BMPR1A (ALK3)      | ETS1          | CDC42                                 | CCL2               |
| CD34               | FLT1 (VEGFR1) | CDH2 (N-Cadherin)                     | CDC42              |
| CDC42              | HES1          | CDH5 (VE-cadherin)                    | Endoglin (CD105)   |
| COL4A1             | ID1           | Endoglin (CD105)                      | FGF2 (bFGF)        |
| CTSS (Cathepsin S) | ID2           | FGF2 (bFGF)                           | FLT4 (VEGFR3)      |
| CXCR4              | Jag1          | FGFR1 (Flt-2)                         | ID1                |
| DLL4               | NOTCH1        | FLT4 (VEGFR3)                         | Jag1               |
| EDNRB              | NRARP         | HSPB1 (HSP27)                         | KDR (VEGFR2, FLK1) |
| ESM1               | SELP          | ICAM2                                 | MMP9               |
| FLT4 (VEGFR3)      | TEK (TIE2)    | ID1                                   | NOS3 (eNOS)        |
| KCNE3              | VWF           | ITGAV (Integrin $\alpha$ V $\beta$ 3) | NRARP              |
| KDR (VEGFR2, FLK1) |               | ITGB1BP1                              | NTN1 (Netrin-1)    |
| LAMA4              |               | KDR (VEGFR2 FLK1)                     | PFKFB3             |
| LOXL2              |               | MAPK14 (p38/MAPK)                     | PLAUR (uPAR)       |
| NID1               |               | MMP2                                  | SRF                |
| NRP1               |               | MMP9                                  | TGFB1              |
| PDGFB              |               | NOS3 (eNOS)                           | VEGFA              |
| PLAUR              |               | NRP1                                  | WNT5A              |
| PLXND1 (PlexinD1)  |               | NTN1 (Netrin-1)                       |                    |
| SRF                |               | PECAM1 (CD31)                         |                    |
| TIE1               |               | PFKFB3                                |                    |
| UNC5B              |               | PLAUR (uPAR)                          |                    |
|                    |               | SERPINE1 (PAI-1)                      |                    |
|                    |               | SRF                                   |                    |
|                    |               | TGFB1                                 |                    |
|                    |               | TJP1 (ZO-1)                           |                    |
|                    |               | VCAM1                                 |                    |
|                    |               | VEGFA                                 |                    |
|                    |               | VEGFC                                 |                    |
|                    |               | WNT5A                                 |                    |

**Table S3. (continued) Lists of genes associated with angiogenic processes.** Genes were selected and organized based on a literature search of various stages of angiogenesis.

| Initiation         | Initiation (cont.) | Prevents Leakage                      | Promotes Leakiness |
|--------------------|--------------------|---------------------------------------|--------------------|
| ACKR1 (DARC)       | SERPINE1 (PAI-1)   | ACVRL1 (ALK1)                         | ANG2               |
| ACVRL1 (ALK1)      | SRF                | AMOTL2                                | EGLN1 (PHD2)       |
| ADAMTS-1           | TEK (TIE2)         | ANGPT1 (Ang1)                         | eNOS               |
| ADAMTS-9           | TGFB1              | CDH2 (N-Cadherin)                     | PLAUR (uPAR)       |
| AMOTL2             | TIE1               | CDH5 (VE-cadherin)                    | TNFSF11 (RANKL)    |
| ANG                | TJP1 (ZO-1)        | CTNNB1                                | VEGFA              |
| ANGPT1 (Ang1)      | UNC5B              | EGFL7 (VE statin)                     | VEGFC              |
| ANGPT2             | VCAM1              | EPHB4                                 | VEGFD              |
| Apelin (APLN)      | VEGFA              | ERG                                   |                    |
| APLNR (APJ)        | VEGFC              | ICAM2                                 |                    |
| BMPR1A (ALK3)      | VEGFR2             | ITGAV (Integrin $\alpha$ V $\beta$ 3) |                    |
| CCL2               | VWF                | ITGB1BP1                              |                    |
| CCN1 (CYR61)       | WNT5A              | LAMA4                                 |                    |
| CD34               |                    | NAA15 (Tubedown-1)                    |                    |
| CD36               |                    | NID1 (Nidogen-1)                      |                    |
| CDC42              |                    | NRARP                                 |                    |
| CDH2 (N-Cadherin)  |                    | PDGFB                                 |                    |
| CDH5 (VE-cadherin) |                    | PECAM1 (CD31)                         |                    |
| Col IV             |                    | RAMP2                                 |                    |
| CTSS (Cathepsin S) |                    | ROBO4                                 |                    |
| CXCR4              |                    | S1PR1 (S1P1 EDG11)                    |                    |
| DLL4               |                    | SERPINE1 (PAI-1)                      |                    |
| EDNRB              |                    | TEK (TIE2)                            |                    |
| Endoglin (CD105)   |                    | TGFB1                                 |                    |
| ESM1               |                    | TJP1 (ZO-1)                           |                    |
| ETS1               |                    | UNC5B                                 |                    |
| FGF2 (bFGF)        |                    |                                       |                    |
| FGFR1 (Fit-2)      |                    |                                       |                    |
| FLT1 (VEGFR1)      |                    |                                       |                    |
| FLT4 (VEGFR3)      |                    |                                       |                    |
| HES1               |                    |                                       |                    |
| HSPB1 (HSP27)      |                    |                                       |                    |
| ICAM2              |                    |                                       |                    |
| ID1                |                    |                                       |                    |
| ID2                |                    |                                       |                    |
| ITGAV (Integrin    |                    |                                       |                    |
| ITGB1BP1           |                    |                                       |                    |
| Jag1               |                    |                                       |                    |
| KCNE3              |                    |                                       |                    |
| KDR (VEGFR2)       |                    |                                       |                    |
| LAMA4              |                    |                                       |                    |
| LOXL2              |                    |                                       |                    |
| MAPK14 (p38/MAPK)  |                    |                                       |                    |
| MMP2               |                    |                                       |                    |
| MMP9               |                    |                                       |                    |
| NID1               |                    |                                       |                    |
| NOS3 (eNOS)        |                    |                                       |                    |
| NOTCH1             |                    |                                       |                    |
| NRARP              |                    |                                       |                    |
| NRP1               |                    |                                       |                    |
| NTN1 (Netrin-1)    |                    |                                       |                    |
| PDGFB              |                    |                                       |                    |
| PECAM1 (CD31)      |                    |                                       |                    |
| PFKFB3             |                    |                                       |                    |
| PLAUR (uPAR)       |                    |                                       |                    |
| PLXND1 (PlexinD1)  |                    |                                       |                    |
| SELP               |                    |                                       |                    |

**Table S3. (continued) Lists of genes associated with angiogenic processes.** Genes were selected and organized based on a literature search of various stages of angiogenesis.

| Cell Junctions                        | Pericyte Adhesion/Interactions        | Pericyte Recruitment | Monocyte Adhesion/Recruitment |
|---------------------------------------|---------------------------------------|----------------------|-------------------------------|
| CDC42                                 | CDH2 (N-Cadherin)                     | ALK1                 | ACKR1 (DARC)                  |
| CDH2                                  | Col IV                                | ANG1                 | CCL2                          |
| CDH5 (VE-cadherin)                    | ITGAV (Integrin $\alpha$ V $\beta$ 3) | CCL2                 | CCL5                          |
| CTNNB1                                | Jag1                                  | F3 (Tissue Factor)   | CCN1 (CYR61)                  |
| ERG                                   | LAMA4                                 | PDGFB                | CDH5 (VE-cadherin)            |
| ICAM2                                 | NID1 (Nidogen-1)                      | S1PR1 (S1P1 EDG11)   | CXCL12 (SDF-1A)               |
| ITGAV (Integrin $\alpha$ V $\beta$ 3) | S1PR1 (S1P1 EDG11)                    | TGFB1                | ICAM2                         |
| PECAM1 (CD31)                         | TEK (TIE2)                            |                      | PECAM1 (CD31)                 |
| TJP1 (ZO-1)                           | VCAM1                                 |                      | SELP                          |
|                                       | VWF                                   |                      | VCAM1                         |
|                                       |                                       |                      | VEGFA                         |

| Inhibits Angiogenesis | Response to Hypoxia | Anti-Apoptotic     | Pro-Apoptotic |
|-----------------------|---------------------|--------------------|---------------|
| ACVR1 (ALK2)          | CXCL12 (SDF-1A)     | ANG1               | BAX           |
| ACVRL1 (ALK1)         | CXCR4               | CDH2 (N-Cadherin)  | BMPR1A (ALK3) |
| ADAMTS1               | HIF1A               | CDH5 (VE-cadherin) | RGS5          |
| ADAMTS9               | LOXL2               | ICAM2              | TP53          |
| EGFL7 (VE statin)     | NFE2L2 (NRF2)       | ITGB1BP1 (ICAP1)   | UNC5B         |
| EGLN1 (PHD2)          |                     | NTN1               |               |
| HSPB1 (HSP27)         |                     | TIE2               |               |
| ID1                   |                     |                    |               |
| NAA15 (Tubedown-1)    |                     |                    |               |
| NID1 (Nidogen-1)      |                     |                    |               |
| Notch1                |                     |                    |               |
| PLXND1 (PlexinD1)     |                     |                    |               |
| ROBO4                 |                     |                    |               |
| SEMA3E                |                     |                    |               |
| UNC5B                 |                     |                    |               |
| VWF                   |                     |                    |               |

| Podosome Formation | Proteases    |
|--------------------|--------------|
| CDC42              | MMP2         |
| CDH5 (VE-cadherin) | MMP9         |
| SRF                | PLAT         |
| VEGFR2             | PLAUR (uPAR) |
|                    |              |
|                    |              |
|                    |              |
|                    |              |
|                    |              |



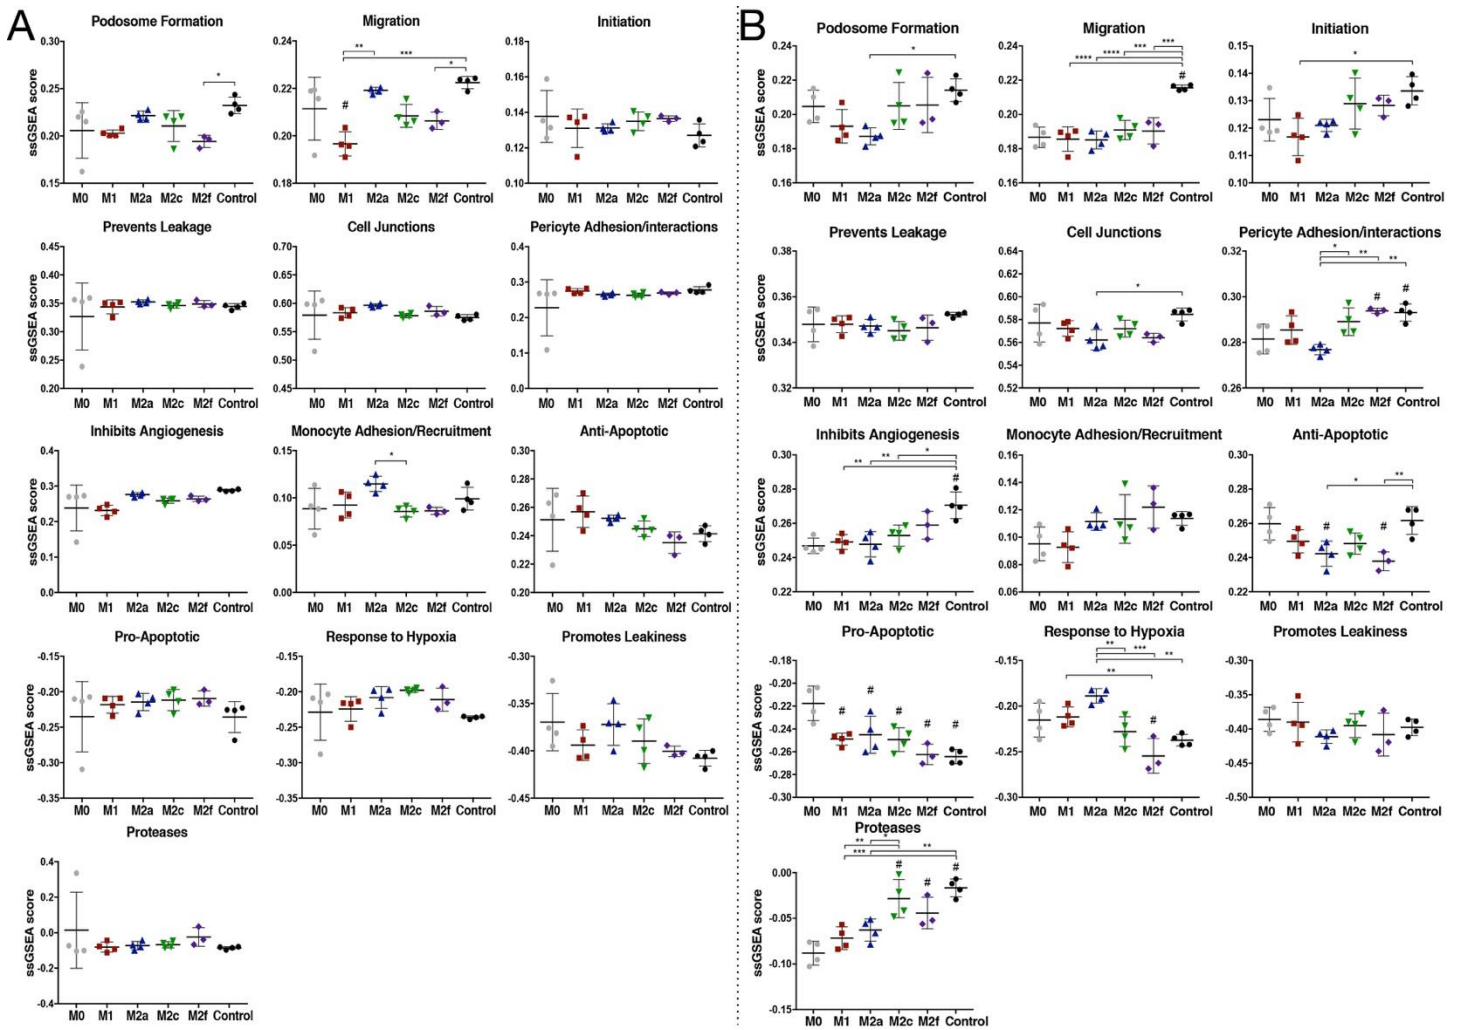

**Figure S4. Single-sample Gene Set Enrichment Analysis (ssGSEA) for gene sets related to specific processes of angiogenesis after transwell co-culture.** Macrophages were co-cultured with ECs for **(A)** 1 day and **(B)** 3 days. Analysis was not restricted to only differentially expressed genes. One-way ANOVA with Tukey's post-hoc analysis; \* $p < 0.05$ , \*\* $p < 0.01$ , \*\*\* $p < 0.001$ , \*\*\*\* $p < 0.0001$ , # indicates  $p < 0.05$  relative to the M0 control.

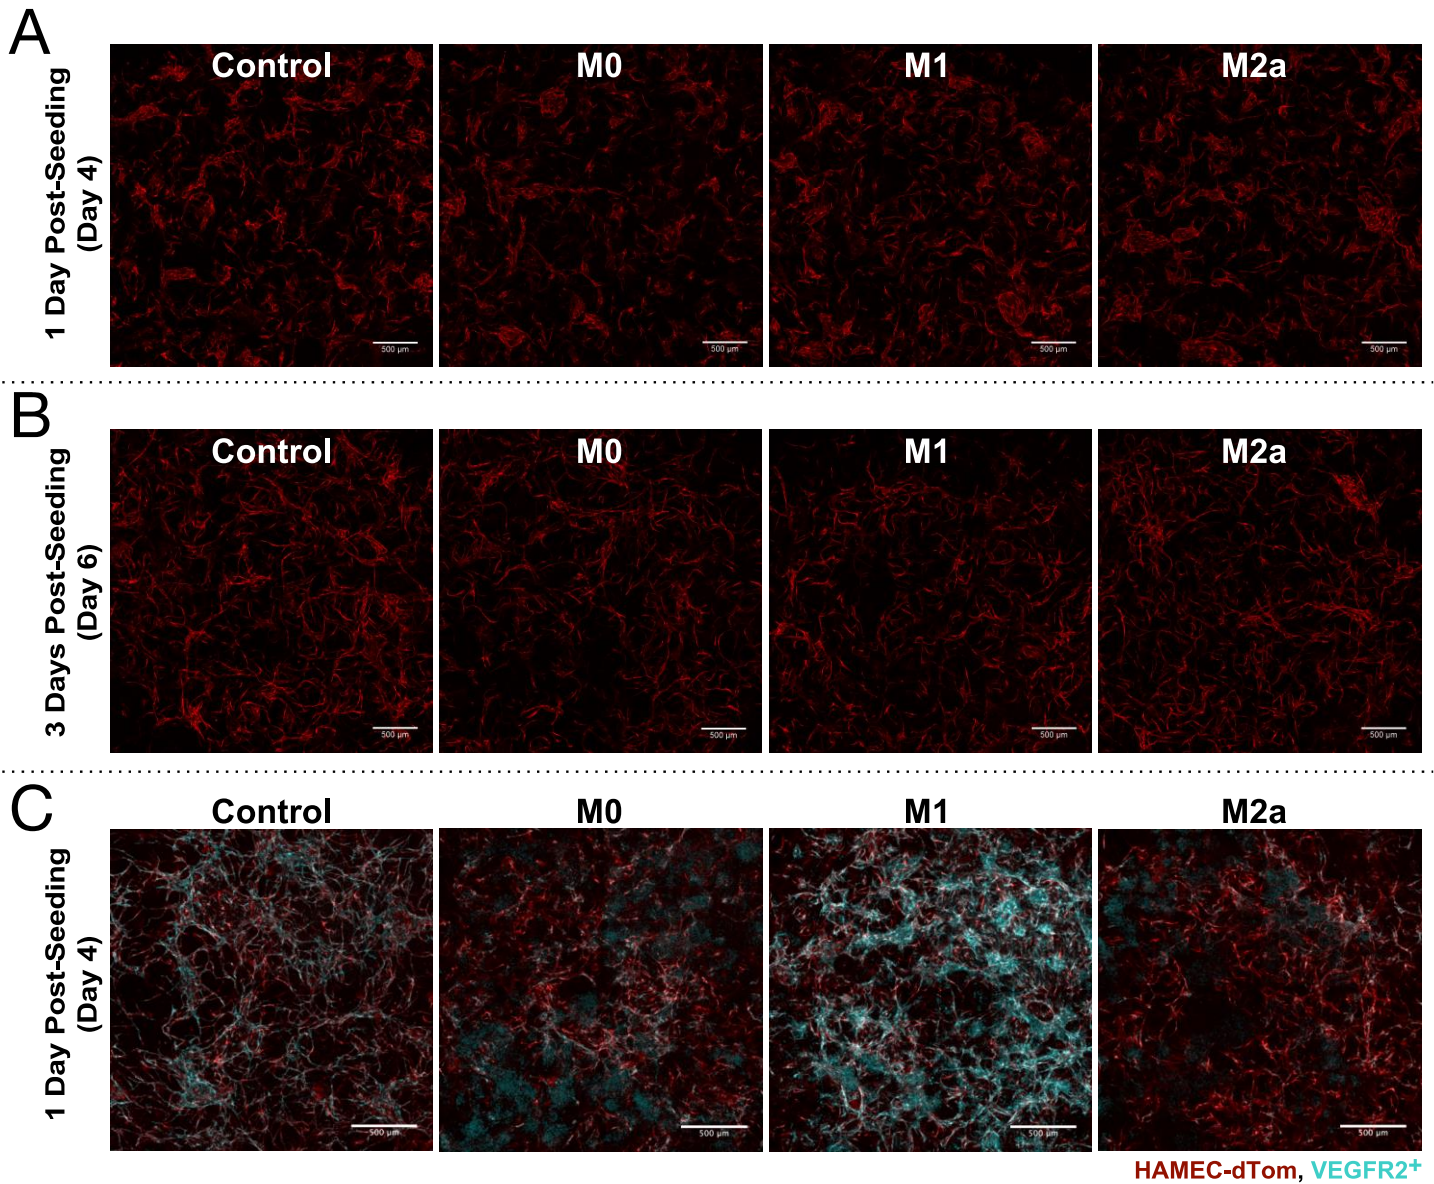

**Figure S5. Effects of macrophage phenotype on *in vitro* tissue vascularization.** Representative maximum intensity projections of engineered vascular grafts seeded for 1 **(A)** and 3 **(B)** days with M0, M1, or M2a macrophages on day 3 of vessel growth. Constructs without macrophages served as a control;  $n = 3$  per group. Scale bar represents  $500 \mu\text{m}$ . **(C)** Constructs were fixed and stained for the tip cell marker KDR (VEGFR2) via whole mount IHC, and 2x2 tiles were acquired using an LSM700 confocal microscope. Constructs without macrophages served as a control;  $n = 4-5$  per group. Scale bar represents  $500 \mu\text{m}$ .



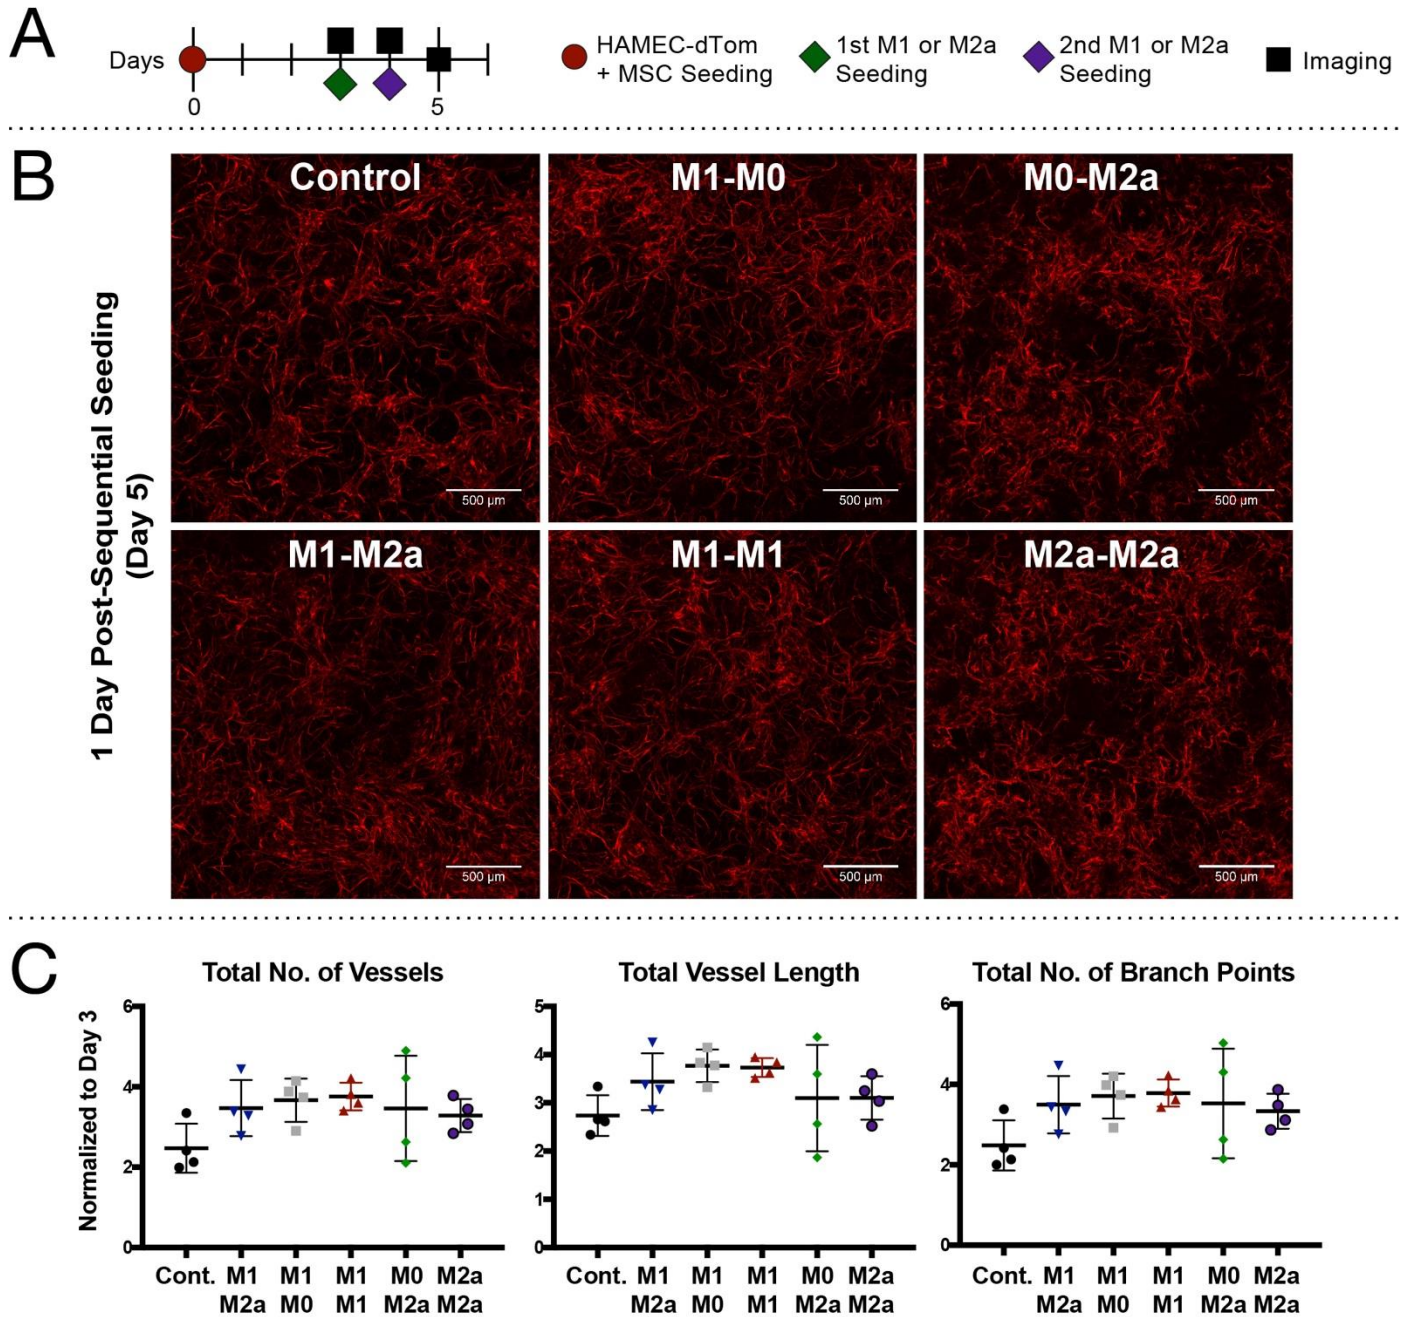

**Figure S6. Impact of sequential control (24 h time interval) over macrophage activation on network development.** (A) Engineered vascular grafts generated via co-culture of HAMEC-dTom and MSCs on Gelfoam scaffolds for self-assembly into blood vessels. M1 and M2a macrophages were sequentially added to the grafts on days 3 and 4 of vessel development and changes in network morphology were quantified on day 5 via live cell confocal microscopy. Controls included no macrophages, early M1, prolonged M1, late M2a, and prolonged M2a. (B) Representative maximum intensity projections of grafts on day 5. Scale bar = 500  $\mu\text{m}$ . (C) Changes in network morphology were quantified in terms of number of vessels, vessel length, and number of branch points (junctions between two vessels) using a custom image analysis code in Matlab<sup>®</sup>. One-way ANOVA with Tukey's post-hoc analysis;  $n = 4$  per group. All data normalized to day 3 baseline measurements and represent mean  $\pm$  SD.

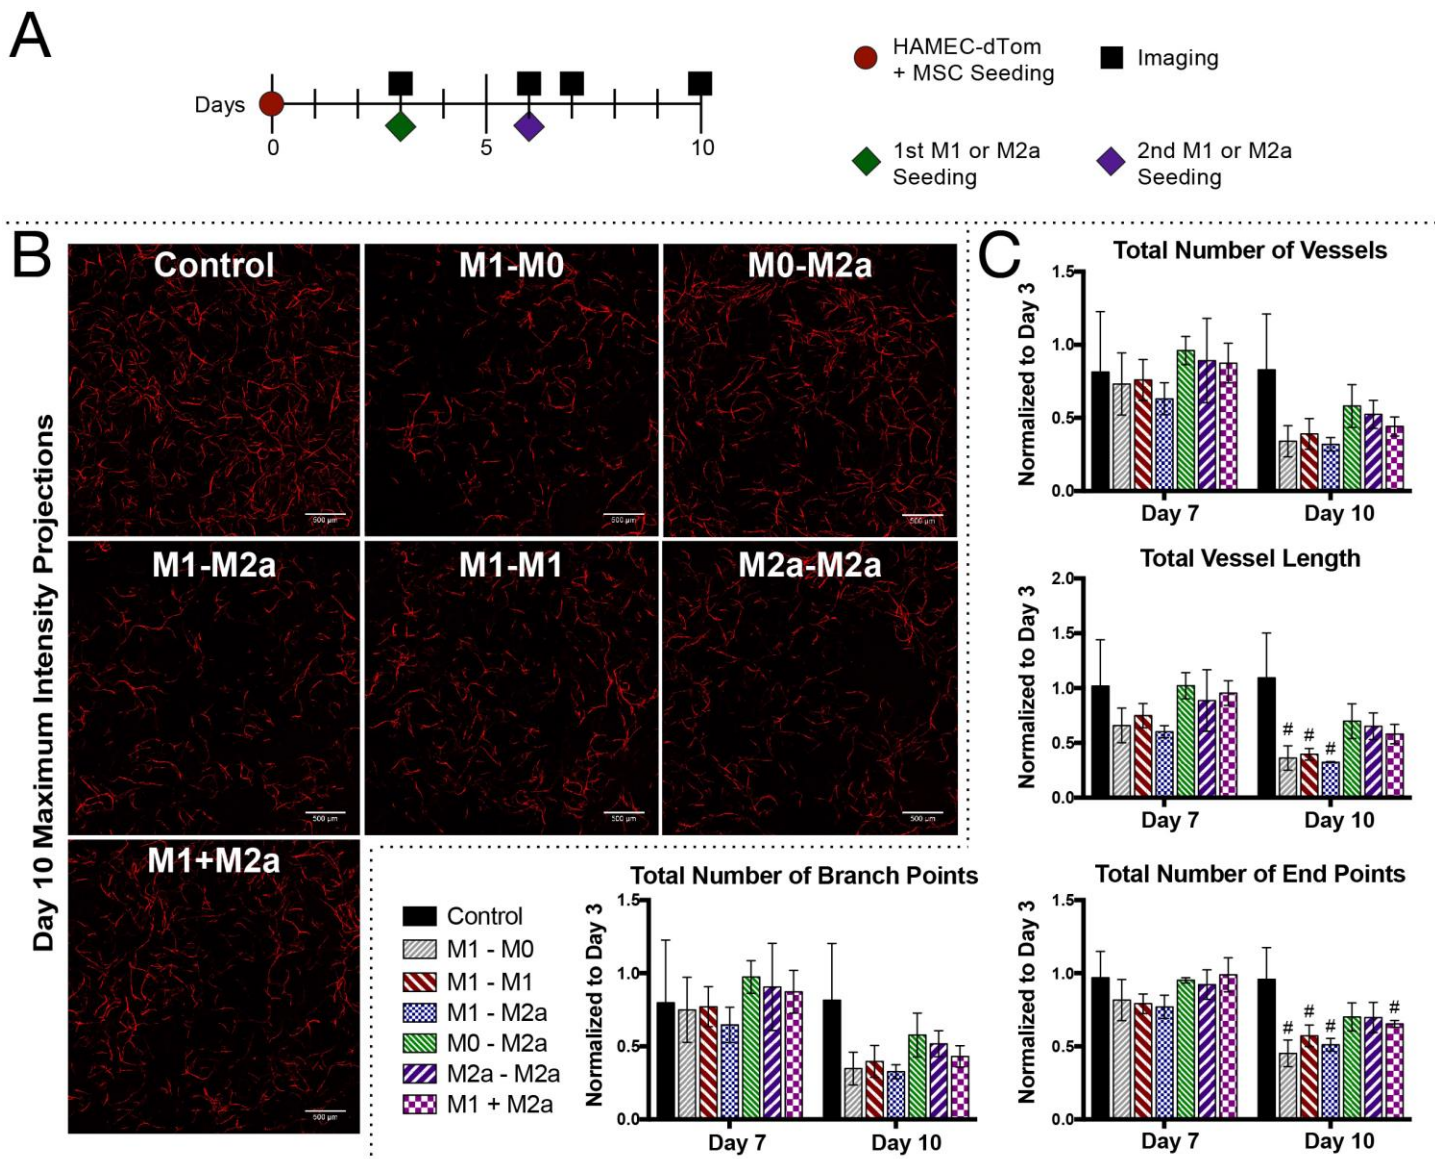

**Figure S7. Impact of sequential control (72 h time interval) over macrophage activation on network development.** (A) Engineered vascular grafts generated via co-culture of HAMEC-dTom and MSCs on Gelfoam scaffolds for self-assembly into blood vessels. M1 and M2a macrophages were sequentially added to the grafts on days 3 and 6 of vessel development and changes in network morphology were quantified on day 7 and 10 via live cell confocal microscopy. Controls included no macrophages, early M1, prolonged M1, late M2a, and prolonged M2a and simultaneous M1 and M2a. (B) Representative maximum intensity projections of grafts on day 10. Scale bar = 500  $\mu$ m. (C) Changes in network morphology were quantified in terms of number of vessels, vessel length, and number of branch points (junctions between two vessels) using a custom image analysis code in Matlab®. Two-way ANOVA with Tukey's post-hoc analysis;  $n = 3$  per group. All data normalized to day 3 baseline measurements and represent mean  $\pm$  SD. # indicates significance relative to control.



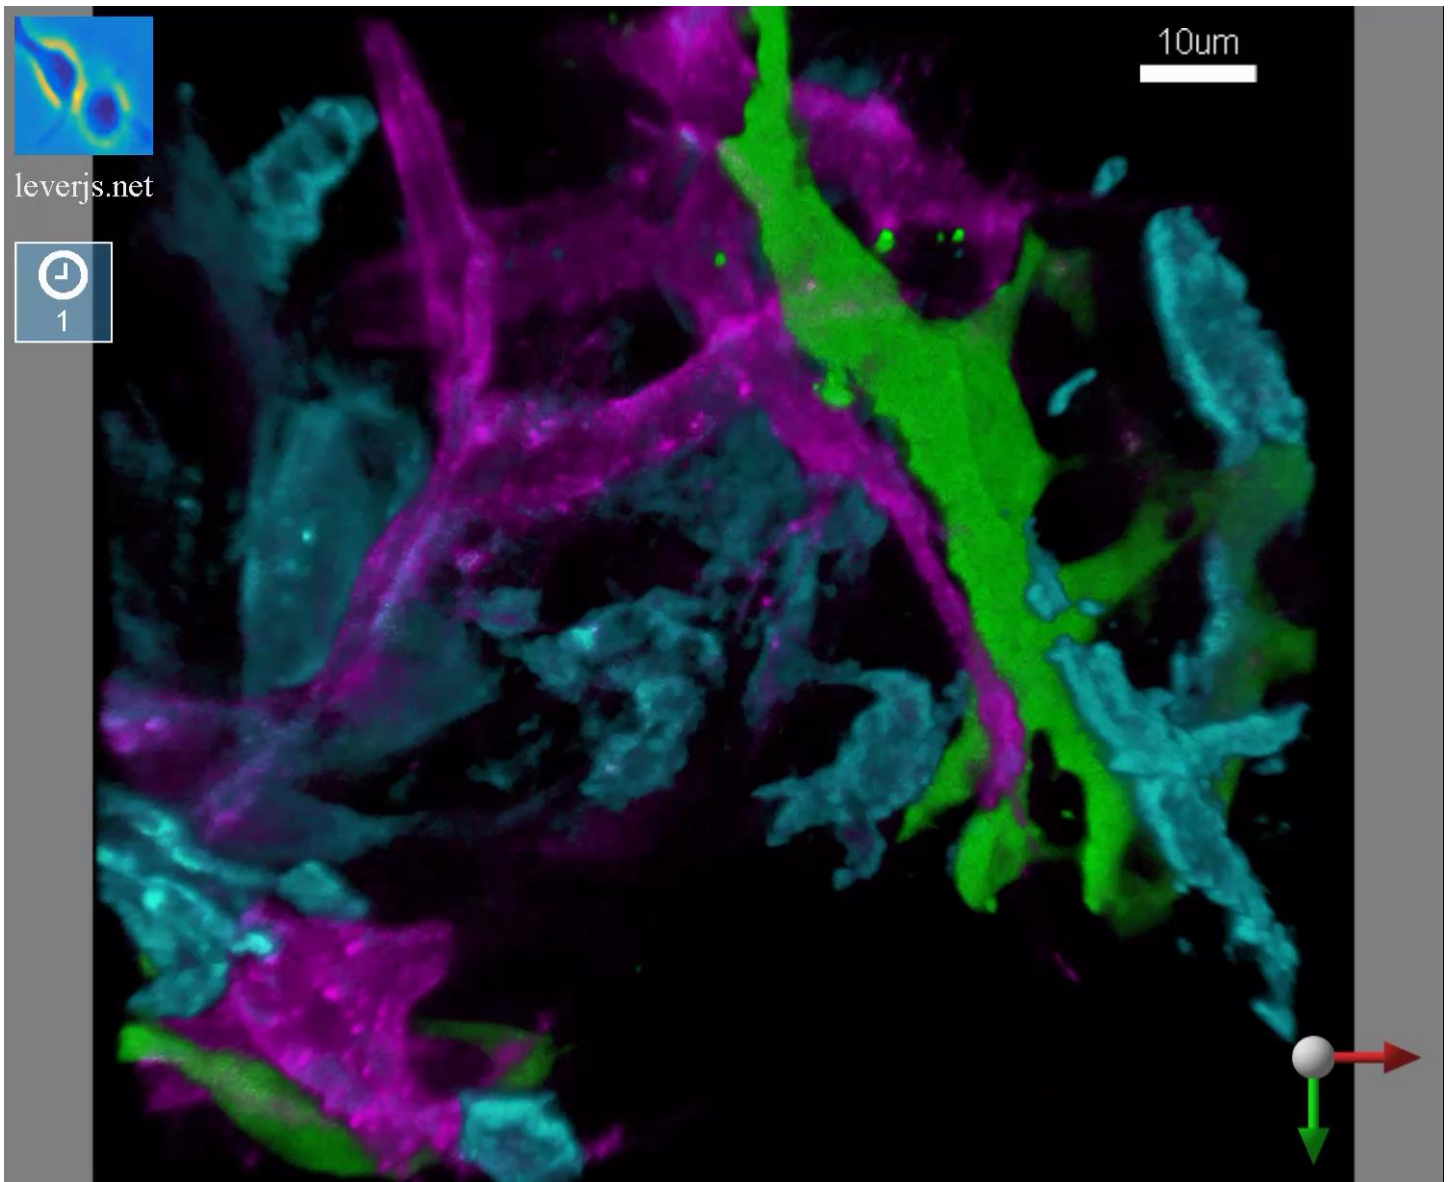

**Movie S1: 3D reconstruction of z-stack depicting F4/80+ macrophages in graft tissue during revascularization and integration with host vessels.** Z-stack image was acquired via confocal microscopy and processed and analyzed in Matlab® as described in the main text. F4/80+ macrophages shown in cyan; engineered vessels shown in green; host vessels shown in magenta. 3D reconstruction corresponds to maximum intensity projection shown in Fig. 4C.

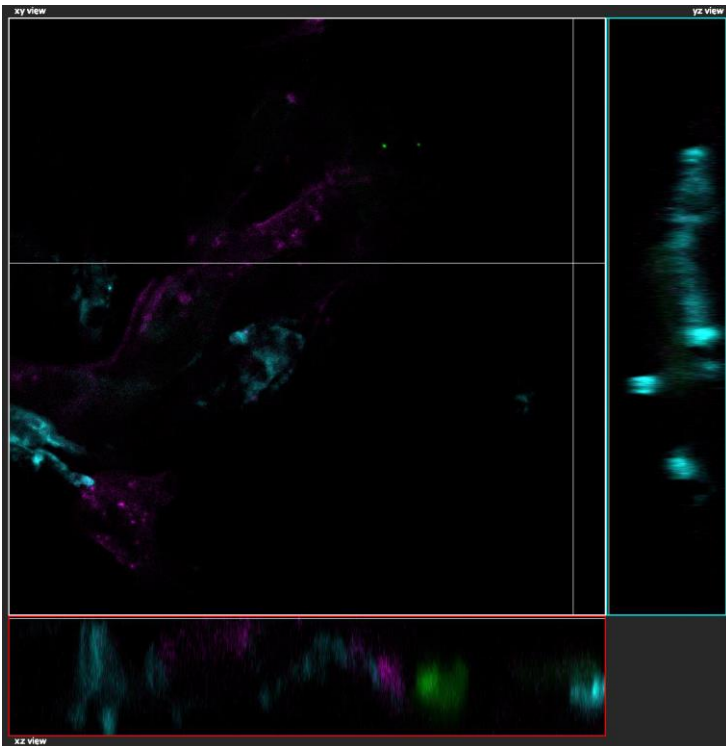

**Movie S2: Orthogonal view depicting F4/80+ macrophages forming tube-like structures in graft tissue 14 days post-implantation.** F4/80+ macrophages shown in cyan; engineered vessels shown in green; host vessels shown in magenta. Orthogonal views correspond to maximum intensity projection shown in Fig. 4C, and were prepared using ImageJ macro written by Martin Höhne.

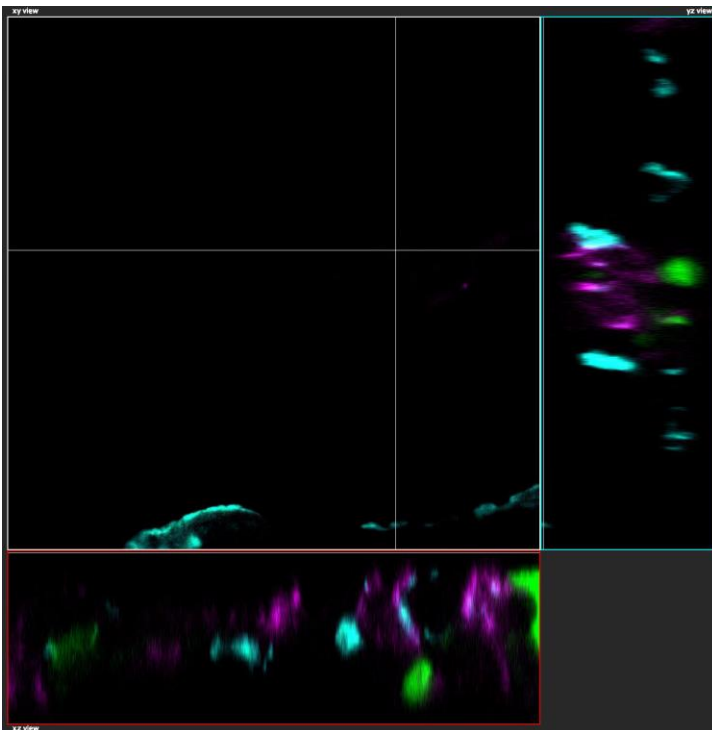

**Movie S3: Orthogonal view depicting F4/80+ macrophage interacting with host vessels structures in graft tissue 14 days post-implantation.** Host vessels shown in magenta; F4/80+ macrophages shown in cyan; engineered vessels shown in green. Orthogonal views correspond to maximum intensity projection shown in Fig. 4D, and were prepared using ImageJ macro written by Martin Höhne.



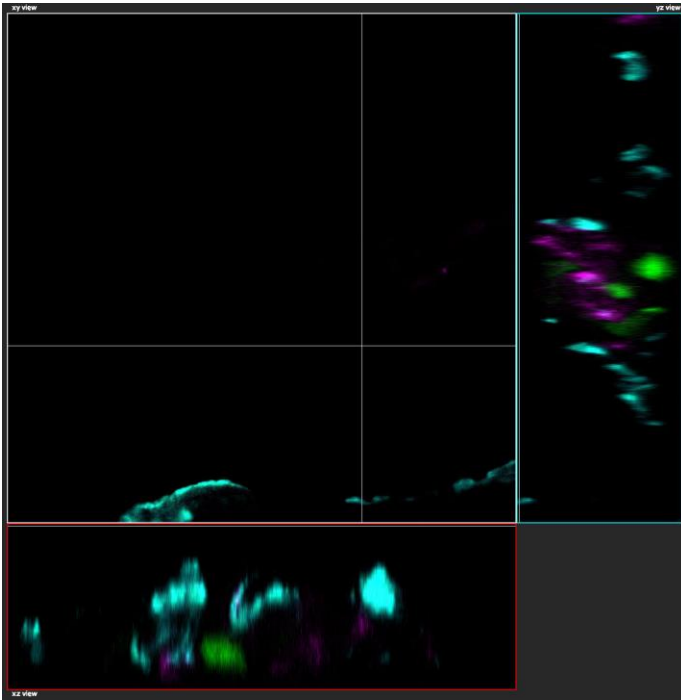

**Movie S4: Orthogonal view depicting F4/80+ macrophages adjacent to both engineered and host vessels structures in graft tissue 14 days post-implantation.** F4/80+ macrophages shown in cyan; engineered vessels shown in green; host vessels shown in magenta. Orthogonal views correspond to maximum intensity projection shown in Fig. 4D, and were prepared using ImageJ macro written by Martin Höhne.

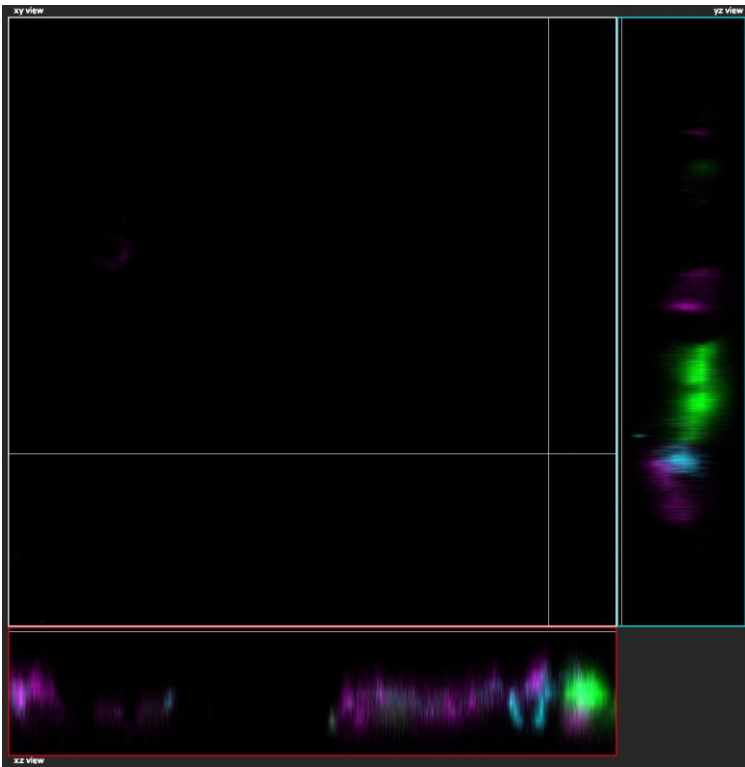

**Movie S5: Orthogonal view depicting F4/80+ macrophage wrapping around host vessels structures in graft tissue 14 days post-implantation.** Host vessels shown in magenta; F4/80+ macrophages shown in cyan; engineered vessels shown in green. Orthogonal views correspond to maximum intensity projection shown in Fig. 4E, and were prepared using ImageJ macro written by Martin Höhne.

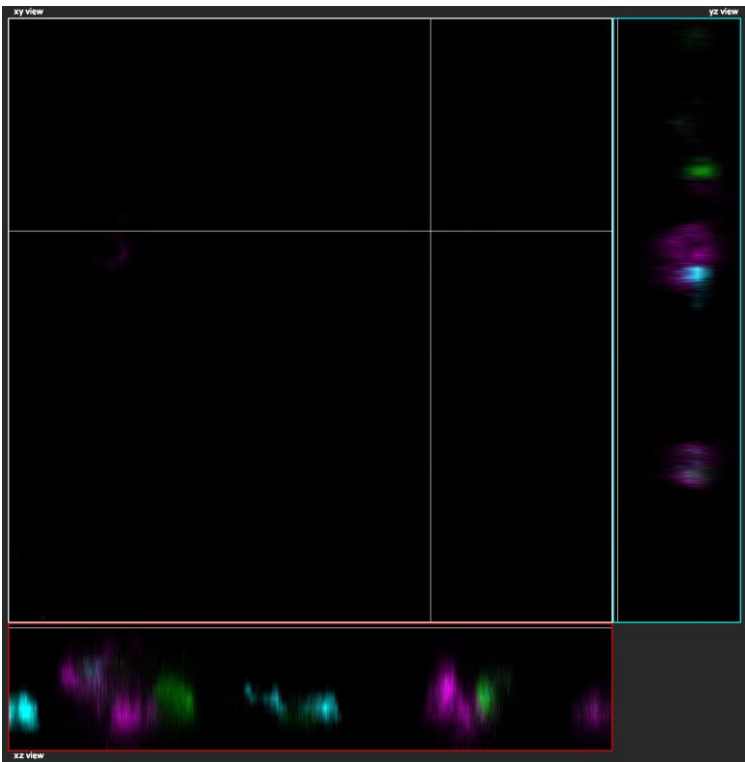

**Movie S6: Orthogonal view depicting F4/80+ macrophage bridging vessel segments structures in graft tissue 14 days post-implantation.** Host vessels shown in magenta; F4/80+ macrophages shown in cyan; engineered vessels shown in green. Orthogonal views correspond to maximum intensity projection shown in Fig. 4E, and were prepared using ImageJ macro written by Martin Höhne.

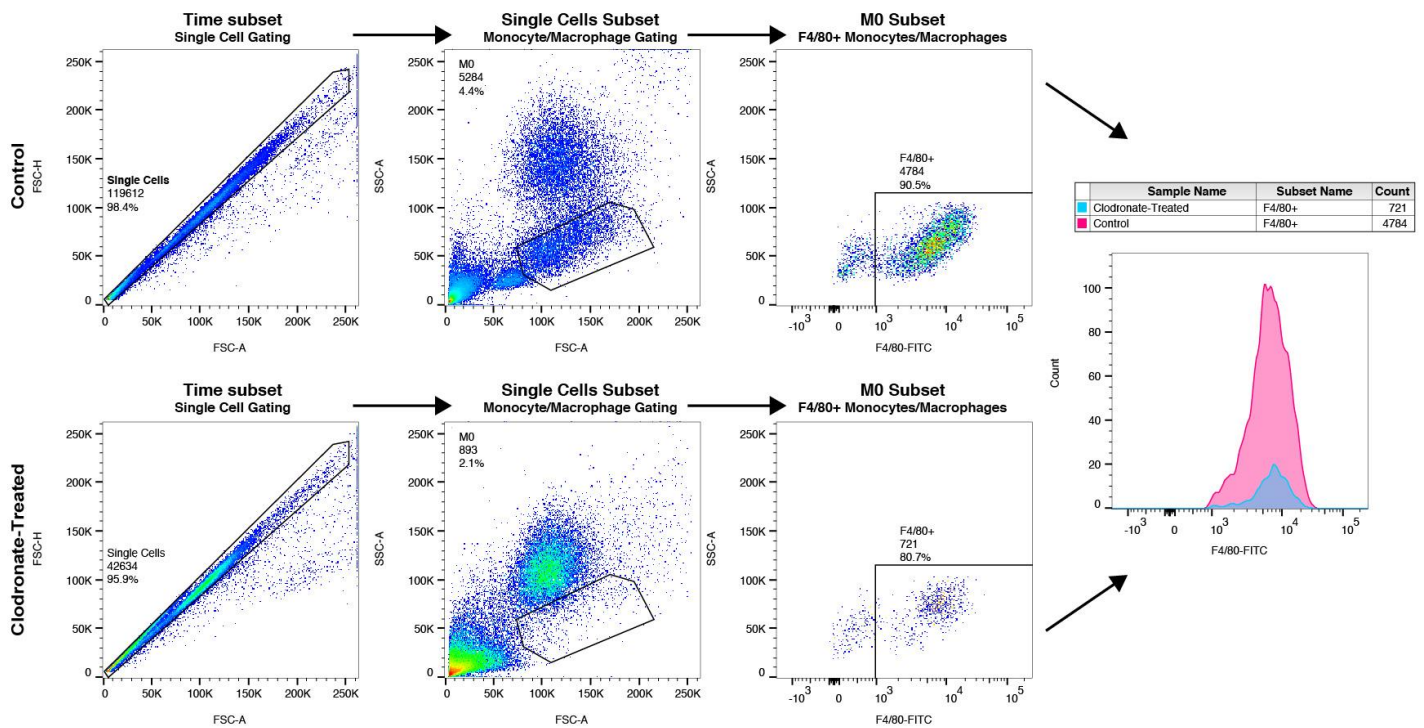

**Figure S8. Sample gating of F4/80+ cells in murine whole blood.** Pseudocolor dot plots show the scatter of cells collected from whole blood and gating scheme used to identify F4/80+ cells within the monocyte/macrophage population of single cells. Histogram illustrates F4/80+ cell population in murine whole blood after macrophage depletion via clodronate-loaded liposome administration (cyan) and in control mice treated with PBS-loaded liposomes (magenta).
